# Supplementary material
Source: PubMed Central journal article supplement (PMC5949831)

## Supporting Information

# Discovery and Development of 8-Substituted Cycloberberine Derivatives as Novel Antibacterial Agents against MRSA

Tianyun Fan, Xinxin Hu, Sheng Tang, Xiaojia Liu, Yanxiang Wang, Hongbin Deng, Xuefu You, Jiandong Jiang, Yinghong Li, Danqing Song

*Beijing Key Laboratory of Antimicrobial Agents, Institute of Medicinal Biotechnology, Chinese Academy of Medical Sciences & Peking Union Medical College, Beijing 100050, China*

### Experimental section

#### General

Melting point (mp) was obtained with CXM-300 melting point apparatus and uncorrected. The  $^1\text{H}$  NMR spectra was performed on a Varian Inova 500 or 600 MHz spectrometer (Varian, San Francisco, CA) and  $^{13}\text{C}$  NMR on a Bruker Avance III 500 or 600 spectrometer with  $\text{Me}_4\text{Si}$  as the internal standard. ESI high-resolution mass spectra (HRMS) was recorded on an Autospec Ultima-TOF mass spectrometer (Micromass UK Ltd, Manchester, UK). Flash chromatography was performed on CombiflashRf 200 (Teledyne, Nebraska, USA), particle size 0.038 mm.

#### Chemistry

##### General synthesis procedures for compounds 5a–l.

To a stirred solution of **1** (7.4 g, 20 mmol) and  $\text{K}_2\text{CO}_3$  (8.3 g, 60 mmol) in

methanol (250 mL), 5% NaOH (10 mL) solution containing NaBH<sub>4</sub> (0.83 g, 22 mmol) was added dropwise. The reaction mixture was stirred at room temperature for 3 h and the precipitated solid was filtered, washed with distilled water (100 mL) and 80% ethanol (100 mL) to give lime-green solid **3** (7.1 g, 81%). Intermediate **3** (7.1 g, 16 mmol) was then reacted with 40% glyoxal (3 mL) in the stirred solvent mixture of CH<sub>3</sub>CN (160 mL) and HOAc (40 mL), which was heated to 93 °C for 6 h. The solvent was evaporated under vacuum, and methanol/HCl (2:1 by vol., 100 mL) was added into the residue. The reaction mixture was stirred at room temperature for 24 h. And then, the solvent was evaporated and the residue was recrystallized from 95% ethanol to obtain orange solid CBBR (5.6 g, 67%). Mp: 185–187 °C.

Then, CBBR (3.6 g, 9.1 mmol) was heated at 195–210 °C in a dry oven under vacuum (20–30 mmHg) for 40 min and the crude material was acidified with concentrated HCl/ethanol (5:95 by vol.) to obtain red solid **4** (3.2 g, 92%). KOH (120 mg, 2.08 mmol) was added to a solution of compound **4** (198 mg, 0.52 mmol) in anhydrous DMF (6 mL), and then corresponding bromides (2.08 mmol) were added after 15 min. The reaction mixture was heated at 68–75 °C for 4–24 h. The solvent was removed by evaporation, the residue was purified with flash column chromatography on silica gel using CH<sub>2</sub>Cl<sub>2</sub> and MeOH as eluent to obtain the desired compounds **5a–l**.

*1,2-Methylenedioxy-8-(2-oxobutoxy)-9-methoxycycloberberine bromide (5a)*. The title compound was prepared from compound **4** (198 mg, 0.52 mmol) and 1-bromo-2-butanone (2.08 mmol, 212 μL) in the same manner as described above to obtain compound **5a** as an orange solid, yield: 27%; Mp: 199 °C (dec.); <sup>1</sup>H NMR (600

MHz, DMSO-*d*<sub>6</sub>)  $\delta$  10.22 (s, 1H), 8.90–8.70 (m, 2H), 8.27–8.15 (m, 2H), 7.60 (s, 1H), 6.40 (s, 2H), 5.26 (t, *J* = 6.6 Hz, 2H), 5.20 (s, 2H), 4.07 (s, 3H), 3.64 (t, *J* = 6.6 Hz, 2H), 2.63 (q, *J* = 7.2 Hz, 2H), 1.02 (t, *J* = 7.2 Hz, 3H); <sup>13</sup>C NMR (151 MHz, DMSO-*d*<sub>6</sub>)  $\delta$  206.6, 149.4, 147.1, 146.6, 143.9, 140.9, 129.3, 128.1, 126.5, 126.0, 122.9, 122.0, 121.0, 119.6, 119.1, 117.0, 116.0, 110.4, 102.9, 76.6, 57.1, 56.0, 31.0, 26.1, 7.0; HRMS: calcd for C<sub>25</sub>H<sub>22</sub>NO<sub>5</sub>Br [M–Br]<sup>+</sup>: 416.1493, found: 416.1481.

*1,2-Methylenedioxy-8-(2-tert-butyl-2-oxoethoxy)-9-methoxycycloberberine bromide (5b)*. The title compound was prepared from compound **4** (198 mg, 0.52 mmol) and 1-bromo-3,3-dimethyl-2-butanone (2.08 mmol, 280  $\mu$ L) in the same manner as described above to obtain compound **5b** as an orange solid, yield: 28%; Mp: 207 °C (dec.); <sup>1</sup>H NMR (500 MHz, DMSO-*d*<sub>6</sub>)  $\delta$  10.23 (s, 1H), 8.89 (dd, *J* = 10.8, 2.4 Hz, 1H), 8.79 (dd, *J* = 10.8, 1.2 Hz, 1H), 8.26 (d, *J* = 9.0 Hz, 1H), 8.21 (dd, *J* = 10.8, 3.6 Hz, 1H), 7.61 (s, 1H), 6.41 (s, 2H), 5.60 (s, 2H), 5.26 (t, *J* = 7.8 Hz, 2H), 4.07 (s, 3H), 3.64 (t, *J* = 7.8 Hz, 2H), 1.17 (s, 9H).; <sup>13</sup>C NMR (126 MHz, DMSO-*d*<sub>6</sub>)  $\delta$  210.1, 149.2, 147.3, 146.7, 144.0, 141.0, 129.4, 128.2, 126.6, 126.0, 123.0, 122.1 (2), 119.7, 118.7, 117.1, 116.1, 110.4, 103.0, 73.5, 57.1, 56.0, 42.3, 26.2, 25.9 (3); HRMS: calcd for C<sub>27</sub>H<sub>26</sub>NO<sub>5</sub>Br [M–Br]<sup>+</sup>: 444.1806, found: 444.1792.

*1,2-Methylenedioxy-8-(2-cyclopropyl-2-oxoethoxy)-9-methoxycycloberberine bromide (5c)*. The title compound was prepared from compound **4** (198 mg, 0.52 mmol) and 2-bromo-1-cyclopropylethanone (208 mmol, 203  $\mu$ L) in the same manner as described above to obtain compound **5c** as an orange solid, yield: 31%; Mp: 193 °C (dec.); <sup>1</sup>H NMR (500 MHz, DMSO-*d*<sub>6</sub>)  $\delta$  10.23 (s, 1H), 8.86 (d, *J* = 9.0 Hz, 1H), 8.79

(d,  $J = 9.0$  Hz, 1H), 8.27 (d,  $J = 9.0$  Hz, 1H), 8.18 (d,  $J = 9.0$  Hz, 1H), 7.60 (s, 1H), 6.40 (s, 2H), 5.38 (s, 2H), 5.25 (t,  $J = 6.5$  Hz, 2H), 4.08 (s, 3H), 3.63 (t,  $J = 6.5$  Hz, 2H), 2.31–2.22 (m, 1H), 1.08–0.91 (m, 4H);  $^{13}\text{C}$  NMR (126 MHz, DMSO- $d_6$ )  $\delta$  205.8, 149.4, 147.2, 146.7, 143.9, 141.0, 129.4, 128.1, 126.6, 126.0, 123.0, 122.1, 121.1, 119.6, 119.2, 117.1, 116.0, 110.4, 103.0, 77.1, 57.1, 56.0, 26.1, 16.8, 10.7 (2); HRMS: calcd for  $\text{C}_{26}\text{H}_{22}\text{NO}_5\text{Br}$   $[\text{M}-\text{Br}]^+$ : 428.1493, found: 428.1481.

*1,2-Methylenedioxy-8-(2-adamantyl-2-oxoethoxy)-9-methoxycycloberberine bromide (5d)*. The title compound was prepared from compound **4** (198 mg, 0.52 mmol) and 1-adamantyl bromomethyl ketone (2.08 mmol, 535 mg) in the same manner as described above to obtain compound **5d** as an orange solid, yield: 34%; Mp: 223 °C (dec.);  $^1\text{H}$  NMR (600 MHz, DMSO- $d_6$ )  $\delta$  10.22 (s, 1H), 8.88 (d,  $J = 9.0$  Hz, 1H), 8.77 (d,  $J = 9.0$  Hz, 1H), 8.25 (d,  $J = 9.6$  Hz, 1H), 8.21 (d,  $J = 9.0$  Hz, 1H), 7.60 (s, 1H), 6.41 (s, 2H), 5.56 (s, 2H), 5.26 (t,  $J = 6.6$  Hz, 2H), 4.06 (s, 3H), 3.64 (t,  $J = 6.6$  Hz, 2H), 2.01 (s, 3H), 1.84 (d,  $J = 2.4$  Hz, 6H), 1.74–1.70 (m, 6H);  $^{13}\text{C}$  NMR (151 MHz, DMSO- $d_6$ )  $\delta$  209.1, 148.9, 147.1, 146.5, 144.0, 140.8, 129.3, 128.1, 126.4, 125.9, 122.8, 121.9, 120.9, 119.5, 118.4, 117.0, 115.9, 110.2, 102.8, 73.4, 57.0, 55.9, 44.4, 37.1 (3), 35.8 (3), 27.1 (3), 26.1; HRMS: calcd for  $\text{C}_{33}\text{H}_{32}\text{NO}_5\text{Br}$   $[\text{M}-\text{Br}]^+$ : 522.2275, found: 522.2257.

*1,2-Methylenedioxy-8-(2-phenyl-2-oxoethoxy)-9-methoxycycloberberine bromide (5e)*. The title compound was prepared from compound **4** (198 mg, 0.52 mmol) and  $\alpha$ -bromoacetophenone (2.08 mmol, 280  $\mu\text{L}$ ) in the same manner as described above to obtain compound **5e** as a brown solid, yield: 31%; Mp: 222 °C (dec.);  $^1\text{H}$  NMR (600

MHz, DMSO-*d*<sub>6</sub>)  $\delta$  10.30 (s, 1H), 8.92 (d, *J* = 9.0 Hz, 1H), 8.84 (d, *J* = 9.0 Hz, 1H), 8.29 (d, *J* = 9.0 Hz, 1H), 8.24 (d, *J* = 9.0 Hz, 1H), 8.02 (d, *J* = 7.2 Hz, 2H), 7.72 (t, *J* = 7.2 Hz, 1H), 7.64–7.54 (m, 3H), 6.41 (s, 2H), 5.98 (s, 2H), 5.27 (s, 2H), 4.00 (s, 3H), 3.65 (s, 2H); <sup>13</sup>C NMR (151 MHz, DMSO-*d*<sub>6</sub>)  $\delta$  194.5, 149.3, 147.3, 146.9, 144.0, 141.0, 134.0, 129.6, 129.4, 129.0 (2), 128.3, 127.8 (2), 126.6, 126.1, 123.0, 122.1, 121.1, 119.7, 119.0, 117.1, 116.1, 110.4, 102.9, 75.0, 57.1, 56.0, 26.2; HRMS: calcd for C<sub>29</sub>H<sub>22</sub>NO<sub>5</sub>Br [M–Br]<sup>+</sup>: 464.1493, found: 464.1500.

*1,2-Methylenedioxy-8-(2-p-fluorophenyl-2-oxoethoxy)-9-methoxycycloberberine bromide (5f)*. The title compound was prepared from compound **4** (198 mg, 0.52 mmol) and 4-fluorophenacyl bromide (2.08 mmol, 288  $\mu$ L) in the same manner as described above to obtain compound **5f** as a reddish solid, yield: 38%; Mp: 209 °C (dec.); <sup>1</sup>H NMR (600 MHz, DMSO-*d*<sub>6</sub>)  $\delta$  10.29 (s, 1H), 8.91 (t, *J* = 9.6 Hz, 1H), 8.83 (t, *J* = 9.6 Hz, 1H), 8.28 (dd, *J* = 9.0, 6.0 Hz, 1H), 8.23 (t, *J* = 9.6 Hz, 1H), 8.13–8.10 (m, 2H), 7.61 (s, 1H), 7.43 (t, *J* = 9.0 Hz, 2H), 6.41 (d, *J* = 2.4 Hz, 2H), 5.96 (s, 2H), 5.27 (t, *J* = 6.6 Hz, 2H), 4.00 (s, 3H), 3.65 (t, *J* = 6.6 Hz, 2H); <sup>13</sup>C NMR (151 MHz, DMSO-*d*<sub>6</sub>)  $\delta$  193.1, 165.3, 149.2, 147.1, 146.6, 143.9, 140.9, 130.8 (2), 130.7, 129.3, 128.1, 126.5, 126.0, 122.9, 122.0, 121.0, 119.6, 118.9, 117.0, 116.0 (2), 115.9, 110.3, 102.8, 74.8, 57.0, 55.9, 26.1; HRMS: calcd for C<sub>29</sub>H<sub>21</sub>FNO<sub>5</sub>Br [M–Br]<sup>+</sup>: 482.1398, found: 482.1382.

*1,2-Methylenedioxy-8-(2-p-trifluoromethylphenyl-2-oxoethoxy)-9-methoxycycloberberine bromide (5g)*. The title compound was prepared from compound **4** (198 mg, 0.52 mmol) and 4-(trifluoromethyl)phenacyl bromide (2.08 mmol, 348  $\mu$ L) in the same

manner as described above to obtain compound **5g** as an orange solid, yield: 42%; Mp: 211 °C (dec.); <sup>1</sup>H NMR (600 MHz, DMSO-*d*<sub>6</sub>) δ 10.29 (s, 1H), 8.92–8.89 (m, 1H), 8.86–8.82 (m, 1H), 8.29 (dd, *J* = 9.0, 6.0 Hz, 1H), 8.25–8.21 (m, 3H), 7.98 (d, *J* = 8.4 Hz, 2H), 7.61 (s, 1H), 6.41 (s, 2H), 6.00 (s, 2H), 5.27 (t, *J* = 6.6 Hz, 2H), 4.00 (s, 3H), 3.65 (t, *J* = 6.6 Hz, 2H); <sup>13</sup>C NMR (151 MHz, DMSO-*d*<sub>6</sub>) δ 194.6, 149.7, 147.6, 147.1, 144.3, 141.4, 137.8, 133.5, 129.9, 129.2 (2), 128.7, 127.0, 126.5, 126.4 (2), 124.1, 123.4, 122.6, 121.5, 120.1, 119.1, 117.5, 116.5, 110.8, 103.4, 75.8, 57.6, 56.5, 26.6; HRMS: calcd for C<sub>30</sub>H<sub>21</sub>F<sub>3</sub>NO<sub>5</sub>Br [M–Br]<sup>+</sup>: 532.1366, found: 532.1349.

*1,2-Methylenedioxy-8-(2-*o*-trifluoromethoxyphenyl-2-oxoethoxy)-9-methoxycycloberberine bromide (5h)*. The title compound was prepared from compound **4** (198 mg, 0.52 mmol) and 2-(trifluoromethoxy)phenacyl bromide (2.08 mmol, 589 mg) in the same manner as described above to obtain compound **5h** as an orange solid, yield: 28%; Mp: 202 °C (dec.); <sup>1</sup>H NMR (600 MHz, DMSO-*d*<sub>6</sub>) δ 10.24 (s, 1H), 8.88 (d, *J* = 9.0 Hz, 1H), 8.82 (d, *J* = 9.0 Hz, 1H), 8.29 (d, *J* = 9.6 Hz, 1H), 8.20 (d, *J* = 9.6 Hz, 1H), 8.01 (dd, *J* = 7.8, 1.8 Hz, 1H), 7.80 (td, *J* = 8.4, 1.8 Hz, 1H), 7.65–7.59 (m, 2H), 7.57 (d, *J* = 8.4 Hz, 1H), 6.41 (s, 2H), 5.77 (s, 2H), 5.26 (t, *J* = 6.6 Hz, 2H), 4.02 (s, 3H), 3.65 (t, *J* = 6.6 Hz, 2H); <sup>13</sup>C NMR (151 MHz, DMSO-*d*<sub>6</sub>) δ 194.1, 149.0, 147.0, 146.6, 145.9, 143.5, 140.8, 134.6, 130.5, 129.3, 128.7, 128.1, 127.9, 126.4, 125.9, 122.9, 122.0, 121.5, 120.9, 119.8, 119.4, 119.0, 117.0, 115.9, 110.3, 102.8, 76.5, 57.0, 56.0, 26.0; HRMS: calcd for C<sub>30</sub>H<sub>21</sub>F<sub>3</sub>NO<sub>6</sub>Br [M–Br]<sup>+</sup>: 548.1316, found: 548.1297.

*1,2-Methylenedioxy-8-(2-*m*-trifluoromethoxyphenyl-2-oxoethoxy)-9-methoxycycloberberine bromide (5i)*. The title compound was prepared from compound **4** (198 mg,

0.52 mmol) and 3-(trifluoromethoxy)phenacyl bromide (2.08 mmol, 589 mg) in the same manner as described above to obtain compound **5i** as a red solid, yield: 23%; Mp: 181 °C (dec.); <sup>1</sup>H NMR (600 MHz, DMSO-*d*<sub>6</sub>) δ 10.29 (s, 1H), 8.89 (d, *J* = 9.0 Hz, 1H), 8.83 (d, *J* = 9.0 Hz, 1H), 8.28 (d, *J* = 9.0 Hz, 1H), 8.21 (d, *J* = 9.0 Hz, 1H), 8.11–8.06 (m, 1H), 7.94 (s, 1H), 7.82–7.71 (m, 2H), 7.61 (s, 1H), 6.41 (s, 2H), 5.98 (s, 2H), 5.27 (t, *J* = 6.6 Hz, 2H), 4.00 (s, 3H), 3.65 (t, *J* = 6.6 Hz, 2H); <sup>13</sup>C NMR (151 MHz, DMSO-*d*<sub>6</sub>) δ 193.5, 149.3, 148.6, 147.2, 146.7, 143.8, 140.9, 136.1, 131.3, 129.4, 128.2, 127.1, 126.5, 126.4, 126.0, 123.0, 122.1, 121.0, 120.0 (2), 119.6, 119.2, 117.1, 116.0, 110.4, 102.9, 75.2, 57.1, 56.0, 26.1; HRMS: calcd for C<sub>30</sub>H<sub>21</sub>F<sub>3</sub>NO<sub>6</sub>Br [M–Br]<sup>+</sup>: 548.1316, found: 548.1296.

*1,2-Methylenedioxy-8-(2-p-methoxy-m-trifluoromethylphenyl-2-oxoethoxy)-9-methoxycycloberberine bromide (5j)*. The title compound was prepared from compound **4** (198 mg, 0.52 mmol) and 2-bromo-1-(4-methoxy-3-(trifluoromethyl)phenyl) ethanone (2.08 mmol, 618 mg) in the same manner as described above to obtain compound **5j** as a red solid, yield: 30%; Mp: 209 °C (dec.); <sup>1</sup>H NMR (600 MHz, DMSO-*d*<sub>6</sub>) δ 10.29 (s, 1H), 8.90 (d, *J* = 9.0 Hz, 1H), 8.83 (d, *J* = 9.6 Hz, 1H), 8.34 (dd, *J* = 9.0, 1.8 Hz, 1H), 8.28 (d, *J* = 9.0 Hz, 1H), 8.22 (d, *J* = 9.6 Hz, 1H), 8.20 (d, *J* = 1.8 Hz, 1H), 7.61 (s, 1H), 7.46 (d, *J* = 9.0 Hz, 1H), 6.41 (s, 2H), 5.96 (s, 2H), 5.27 (t, *J* = 6.6 Hz, 2H), 4.02 (s, 3H), 4.01 (s, 3H), 3.65 (t, *J* = 6.6 Hz, 2H); <sup>13</sup>C NMR (151 MHz, DMSO-*d*<sub>6</sub>) δ 192.4, 160.9, 149.3, 147.2, 146.6, 143.9, 140.8, 134.5, 129.3, 128.1, 126.6 (2), 126.4, 126.2, 126.0, 123.1, 122.9, 122.0, 121.0, 119.6, 119.0, 117.0, 115.9, 113.1, 110.3, 102.8, 74.8, 57.0, 56.8, 55.9, 26.1; HRMS: calcd for C<sub>31</sub>H<sub>23</sub>F<sub>3</sub>NO<sub>6</sub>Br [M–Br]<sup>+</sup>:

562.1472, found: 562.1451.

*1,2-Methylenedioxy-8-(2-m-methoxyphenyl-2-oxoethoxy)-9-methoxycycloberberine bromide (5k)*. The title compound was prepared from compound **4** (198 mg, 0.52 mmol) and 3-methoxyphenacyl bromide (2.08 mmol, 328  $\mu$ L) in the same manner as described above to obtain compound **5k** as a yellow solid, yield: 33%; Mp: 193  $^{\circ}$ C (dec.);  $^1\text{H}$  NMR (600 MHz, DMSO- $d_6$ )  $\delta$  10.30 (s, 1H), 8.94–8.87 (m, 1H), 8.86–8.79 (m, 1H), 8.31–8.25 (m, 1H), 8.25–8.20 (m, 1H), 7.64–7.59 (m, 2H), 7.53–7.46 (m, 2H), 7.29 (dd,  $J = 8.4, 2.4$  Hz, 1H), 6.41 (s, 2H), 5.97 (s, 2H), 5.27 (t,  $J = 6.6$  Hz, 2H), 4.01 (s, 3H), 3.83 (s, 3H), 3.65 (t,  $J = 6.6$  Hz, 2H);  $^{13}\text{C}$  NMR (151 MHz, DMSO- $d_6$ )  $\delta$  194.2, 159.4, 149.2, 147.2, 146.6, 143.9, 140.8, 135.2, 130.1, 129.3, 128.1, 126.5, 126.0, 122.9, 122.0, 121.0 (2), 119.8, 119.6, 118.9, 117.0, 115.9, 112.2, 110.3, 102.8, 75.0, 57.0, 55.9, 55.3, 26.1; HRMS: calcd for  $\text{C}_{30}\text{H}_{24}\text{NO}_6\text{Br}$   $[\text{M}-\text{Br}]^+$ : 494.1598, found: 494.1581.

*1,2-Methylenedioxy-8-(2-p-methylphenyl-2-oxoethoxy)-9-methoxycycloberberine bromide (5l)*. The title compound was prepared from compound **4** (198 mg, 0.52 mmol) and 4-methylphenacyl bromide (2.08 mmol, 446  $\mu$ L) in the same manner as described above to obtain compound **5l** as a red solid, yield: 37%; Mp: 218  $^{\circ}$ C (dec.);  $^1\text{H}$  NMR (600 MHz, DMSO- $d_6$ )  $\delta$  10.30 (s, 1H), 8.88 (d,  $J = 9.0$  Hz, 1H), 8.80 (d,  $J = 9.0$  Hz, 1H), 8.26 (d,  $J = 9.0$  Hz, 1H), 8.21 (d,  $J = 9.0$  Hz, 1H), 7.92 (d,  $J = 8.4$  Hz, 2H), 7.61 (s, 1H), 7.40 (d,  $J = 8.4$  Hz, 2H), 6.41 (s, 2H), 5.95 (s, 2H), 5.27 (t,  $J = 6.6$  Hz, 2H), 4.00 (s, 3H), 3.65 (t,  $J = 6.6$  Hz, 2H), 2.41 (s, 3H);  $^{13}\text{C}$  NMR (151 MHz, DMSO- $d_6$ )  $\delta$  193.9, 149.2, 147.2, 146.6, 144.4, 144.0, 140.8, 131.4, 129.4 (2), 129.3,



128.1, 127.8 (2), 126.5, 126.0, 122.9, 122.0, 121.0, 119.6, 118.8, 117.0, 115.9, 110.3, 102.8, 74.8, 57.0, 55.9, 26.1, 21.2; HRMS: calcd for C<sub>30</sub>H<sub>24</sub>NO<sub>5</sub>Br [M-Br]<sup>+</sup>: 478.1649, found: 478.1657.

### General synthesis procedures for compounds 6a–c and 7.

The corresponding amines (15.0 mmol) were added to CBBR (395 mg, 1.0 mmol), the mixture was stirred and heated for 4–32 h at 100–116°C. The mixture was cooled, and purified with C18 column using H<sub>2</sub>O and MeOH as gradient eluent to obtain the desired compounds **6a–c** and **7**.

*1,2-Methylenedioxy-8-benzylamino-9-methoxycycloberberine chloride (6a)*. The title compound was prepared from CBBR (395 mg, 1.0 mmol) and phenylmethanamine (1.6 mL, 15.0 mmol) in the same manner as the above procedures to obtain compound **6a** as a purple solid, yield: 37%; Mp: 206 °C (dec.); <sup>1</sup>H NMR (600 MHz, CD<sub>3</sub>OD, CDCl<sub>3</sub>) δ 9.63 (s, 1H), 8.53 (d, *J* = 9.6 Hz, 1H), 8.20 (d, *J* = 9.0 Hz, 1H), 8.14 (d, *J* = 9.0 Hz, 1H), 7.88 (d, *J* = 9.0 Hz, 1H), 7.42 (d, *J* = 7.8 Hz, 2H), 7.39–7.34 (m, 3H), 7.28 (t, *J* = 7.2 Hz, 1H), 6.30 (s, 2H), 4.91 (s, 2H), 4.89 (t, *J* = 6.6 Hz, 2H), 4.04 (s, 3H), 3.63 (t, *J* = 6.6 Hz, 2H); <sup>13</sup>C NMR (151 MHz, CD<sub>3</sub>OD, CDCl<sub>3</sub>) δ 149.5, 148.1, 147.8, 142.8, 140.9, 140.4, 129.7 (3), 129.5, 129.3, 128.6, 128.3 (2), 126.4, 123.9, 122.8, 121.3, 118.8, 117.4, 116.5, 114.0, 111.1, 104.0, 57.2, 57.0, 53.7, 28.0; HRMS: calcd for C<sub>28</sub>H<sub>23</sub>N<sub>2</sub>O<sub>3</sub>Cl [M-Cl]<sup>+</sup>: 435.1703, found: 435.1698.

*1,2-Methylenedioxy-8-p-methoxybenzylamino-9-methoxycycloberberine chloride (6b)*. The title compound was prepared from CBBR (395 mg, 1.0 mmol) and 4-methoxybenzylamine (2.0 mL, 15.0 mmol) in the same manner as the above

procedures to obtain compound **6b** as a purple solid, yield: 30%; Mp: 212 °C (dec.); <sup>1</sup>H NMR (600 MHz, CD<sub>3</sub>OD, CDCl<sub>3</sub>) δ 9.64 (s, 1H), 8.54 (d, *J* = 9.6 Hz, 1H), 8.22 (d, *J* = 9.0 Hz, 1H), 8.19 (d, *J* = 9.0 Hz, 1H), 7.89 (d, *J* = 9.0 Hz, 1H), 7.35 (s, 1H), 7.32 (d, *J* = 8.4 Hz, 2H), 6.91 (d, *J* = 8.4 Hz, 2H), 6.33 (s, 2H), 4.91 (t, *J* = 6.6 Hz, 2H), 4.83 (s, 2H), 4.09 (s, 3H), 3.79 (s, 3H), 3.64 (t, *J* = 6.6 Hz, 2H); <sup>13</sup>C NMR (151 MHz, CD<sub>3</sub>OD, CDCl<sub>3</sub>) δ 160.0, 149.2, 147.8, 147.4, 142.6, 140.6, 131.6, 129.5 (2), 129.1, 128.9, 125.7, 124.0, 123.7, 122.3, 120.9, 118.5, 117.0, 116.2, 114.9 (2), 113.8, 111.0, 103.7, 57.1, 56.7, 55.6, 53.2, 27.9; HRMS: calcd for C<sub>29</sub>H<sub>25</sub>N<sub>2</sub>O<sub>4</sub>Cl [M-Cl]<sup>+</sup>: 465.1809, found: 465.1803.

*1,2-Methylenedioxy-8-(1-(furan-2-yl)methylamino)-9-methoxycycloberberine chloride (6c)*. The title compound was prepared from CBBR (395 mg, 1.0 mmol) and 1-(furan-2-yl)methanamine (1.3 mL, 15.0 mmol) in the same manner as the above procedure to obtain compound **6c** as a purple solid, yield: 29%; Mp: 192 °C (dec.); <sup>1</sup>H NMR (600 MHz, CD<sub>3</sub>OD) δ 9.75 (s, 1H), 8.46 (d, *J* = 9.0 Hz, 1H), 8.20 (d, *J* = 9.0 Hz, 1H), 8.03 (d, *J* = 9.0 Hz, 1H), 7.87 (d, *J* = 8.4 Hz, 1H), 7.44 (d, *J* = 1.2 Hz, 1H), 7.37 (s, 1H), 6.35–6.25 (m, 5H), 5.05 (t, *J* = 6.0 Hz, 2H), 4.80 (s, 2H), 4.04 (s, 3H), 3.66 (t, *J* = 6.0 Hz, 2H); <sup>13</sup>C NMR (151 MHz, CD<sub>3</sub>OD) δ 154.6, 151.1, 148.5, 148.3, 143.9, 143.1, 140.2, 130.1, 129.9, 127.3, 124.2, 124.1, 123.8, 121.6, 119.1, 118.5, 117.7, 115.9, 111.6, 111.5, 109.1, 104.6, 57.6, 57.5, 47.0, 28.3; HRMS: calcd for C<sub>26</sub>H<sub>21</sub>N<sub>2</sub>O<sub>4</sub>Cl [M-Cl]<sup>+</sup>: 425.1496, found: 425.1490.

*1,2-Methylenedioxy-8-*o,p*-dimethoxybenzylamino-9-methoxycycloberberine chloride (7)*. The title compound was prepared from CBBR (395 mg, 1.0 mmol) and

(2,4-dimethoxyphenyl)methanamine (2.3 mL, 15 mmol) in the same manner as the above procedure to obtain compound **7** as a purple solid, yield: 33%; Mp: 170 °C (dec.); <sup>1</sup>H NMR (600 MHz, DMSO-*d*<sub>6</sub>) δ 10.03 (s, 1H), 8.65 (s, 1H), 8.18 (s, 1H), 8.04 (s, 1H), 7.84 (s, 1H), 7.52 (s, 1H), 7.15 (d, *J* = 8.4 Hz, 1H), 6.78 (s, 1H), 6.50 (s, 1H), 6.39 (d, *J* = 7.8 Hz, 1H), 6.34 (s, 2H), 5.01 (t, *J* = 6.0 Hz, 2H), 4.72 (d, *J* = 5.4 Hz, 2H), 3.89 (s, 3H), 3.74 (s, 3H), 3.67 (s, 3H), 3.59 (s, 2H); <sup>13</sup>C NMR (151 MHz, DMSO-*d*<sub>6</sub>) δ 160.4, 158.4, 148.3, 148.2, 146.6, 141.2, 140.2, 130.2, 128.7, 128.2, 126.6, 122.9, 122.4 (2), 121.6, 120.0, 117.4, 116.5, 115.7, 112.9, 110.6, 104.7, 103.2, 98.8, 57.2, 55.8, 55.7, 55.6, 47.6, 26.9; HRMS: calcd for C<sub>30</sub>H<sub>27</sub>N<sub>2</sub>O<sub>5</sub>Cl [M-Cl]<sup>+</sup>: 495.1915, found: 495.1921.

**Synthesis procedures for 1,2-methylenedioxy-8-amino-9-methoxycycloberberine chloride (8).**

Compound **7** (530 mg, 1.00 mmol) was added to a mixed solution of methanol/HCl (1:1 by vol., 6 mL), and the mixture was reacted for 12 h at room temperature. Then the solution was concentrated to obtain a crude compound, which was further purified through flash column chromatography on silica gel with CH<sub>3</sub>OH/CH<sub>2</sub>Cl<sub>2</sub> as the eluents to get the desired compound **8** as a purple solid, yield: 81%; Mp: 244 °C (dec.); <sup>1</sup>H NMR (600 MHz, DMSO-*d*<sub>6</sub>) δ 10.33 (s, 1H), 8.69 (d, *J* = 9.6 Hz, 1H), 8.07 (d, *J* = 9.6 Hz, 1H), 8.04 (d, *J* = 8.4 Hz, 1H), 7.85 (d, *J* = 9.6 Hz, 1H), 7.54 (s, 1H), 7.21 (s, 2H), 6.37 (s, 2H), 4.96 (t, *J* = 6.6 Hz, 2H), 4.03 (s, 3H), 3.59 (t, *J* = 6.6 Hz, 2H); <sup>13</sup>C NMR (151 MHz, DMSO-*d*<sub>6</sub>) δ 147.4, 145.9, 144.0, 140.6, 140.2, 127.9, 126.6, 125.9, 121.7, 121.6, 121.1, 121.0, 116.9, 116.1, 111.1, 110.1,

108.5, 102.6, 56.3, 54.9, 26.3; HRMS: calcd for C<sub>21</sub>H<sub>17</sub>N<sub>2</sub>O<sub>3</sub>Cl [M-Cl]<sup>+</sup>: 345.1234, found: 345.1237.

### General synthesis procedures for compounds 9a–f.

To a stirred solution of compound **8** (100 mg, 0.26 mmol) in anhydrous CH<sub>3</sub>CN (6 mL) were added pyridine (2.34–8.19 mmol) and corresponding acyl chloride (1.56–5.46 mmol). The reaction mixture was heated at 40–91 °C for 3–72 h. The mixture was cooled, filtered and the resulting residue was purified using flash column chromatography on silica gel with CH<sub>2</sub>Cl<sub>2</sub>/MeOH as gradient eluent to obtain desired compounds **9a–f**.

*1,2-Methylenedioxy-8-(1-adamantanecarbonylamino)-9-methoxycycloberberine chloride (9a)*. The title compound was prepared from compound **8** (100 mg, 1.0 mmol) and 1-adamantanecarbonyl chloride (872 µL, 5.46 mmol) with pyridine (669 µL, 8.19 mmol) at 48 °C for 72 h using the above procedure to obtain compound **9a** as an orange solid, yield: 37%; Mp: 298 °C (dec.); <sup>1</sup>H NMR (600 MHz, DMSO-*d*<sub>6</sub>): δ 9.54 (s, 1H), 9.49 (s, 1H), 9.09 (d, *J* = 9.6 Hz, 1H), 8.94 (dd, *J* = 1.8, 9.6 Hz, 1H), 8.32 (d, *J* = 9.0 Hz, 1H), 8.25 (d, *J* = 9.0 Hz, 1H), 7.62 (s, 1H), 6.41 (s, 2H), 5.31 (t, *J* = 6.6 Hz, 2H), 4.07 (s, 3H), 3.64 (t, *J* = 6.6 Hz, 2H), 2.11 (s, 10H), 1.78 (s, 5H); <sup>13</sup>C NMR (151 MHz, DMSO-*d*<sub>6</sub>): δ 177.6, 154.6, 147.0, 146.6, 140.9, 129.3, 128.2, 126.5, 124.7, 124.6, 123.3, 123.1 (2), 122.5, 120.9, 116.9, 116.0, 110.2, 102.8, 57.0, 56.1, 40.8, 38.39, 38.4 (2), 36.1 (3), 27.6 (3), 26.0; HRMS: calcd for C<sub>32</sub>H<sub>31</sub>N<sub>2</sub>O<sub>4</sub>Cl [M-Cl]<sup>+</sup>: 507.2278, found: 507.2281.

*1,2-Methylenedioxy-8-(2-cyclopentylacetamido)-9-methoxycycloberberine chloride*

(**9b**). The title compound was prepared from compound **8** (100 mg, 1.0 mmol) and cyclopentylacetyl chloride (210  $\mu$ L, 1.56 mmol) with pyridine (189  $\mu$ L, 2.34 mmol) at 45 °C for 2 h using the above procedure to obtain compound **9b** as a red solid, yield: 17%; Mp: 219 °C (dec.);  $^1\text{H}$  NMR (600 MHz, DMSO- $d_6$ )  $\delta$  10.11 (s, 1H), 9.81 (s, 1H), 9.07 (d,  $J$  = 9.6 Hz, 1H), 8.94 (d,  $J$  = 9.6 Hz, 1H), 8.32 (d,  $J$  = 9.0 Hz, 1H), 8.24 (d,  $J$  = 9.6 Hz, 1H), 7.61 (s, 1H), 6.41 (s, 2H), 5.25 (t,  $J$  = 6.6 Hz, 2H), 4.09 (s, 3H), 3.65 (t,  $J$  = 6.6 Hz, 2H), 2.60 (d,  $J$  = 7.2 Hz, 2H), 2.43–2.26 (m, 1H), 1.94–1.15 (m, 8H);  $^{13}\text{C}$  NMR (151 MHz, DMSO- $d_6$ )  $\delta$  172.3, 154.1, 147.6, 146.6, 140.9, 129.2, 128.1, 126.4, 124.5, 124.1, 123.1, 123.0, 122.5, 122.4, 120.9, 116.9, 115.9, 110.2, 102.8, 56.9, 55.9, 41.4, 36.2, 31.9 (2), 26.0, 24.6 (2); HRMS: calcd for  $\text{C}_{28}\text{H}_{27}\text{N}_2\text{O}_4\text{Cl}$   $[\text{M}-\text{Cl}]^+$ : 455.1965, found: 455.1950.

*1,2-Methylenedioxy-8-nicotinoylamino-9-methoxycycloberberine chloride (9c)*. The title compound was prepared from compound **8** (100 mg, 1.0 mmol) and nicotinoyl chloride (210  $\mu$ L, 1.56 mmol) with pyridine (189  $\mu$ L, 2.34 mmol) at 70 °C for 3 h using the above procedure to obtain compound **9c** as a red solid, yield: 28%; Mp: 227 °C (dec.);  $^1\text{H}$  NMR (600 MHz, DMSO- $d_6$ ):  $\delta$  10.90 (s, 1H), 10.12 (s, 1H), 9.35 (s, 1H), 9.14 (d,  $J$  = 9.6 Hz, 1H), 8.95 (d,  $J$  = 9.0 Hz, 1H), 8.86 (d,  $J$  = 3.6 Hz, 1H), 8.52 (d,  $J$  = 7.8 Hz, 1H), 8.38 (d,  $J$  = 9.6 Hz, 1H), 8.24 (d,  $J$  = 9.0 Hz, 1H), 7.67 (dd,  $J$  = 7.2, 4.8 Hz, 1H), 7.60 (s, 1H), 6.41 (s, 2H), 5.27 (t,  $J$  = 6.6 Hz, 2H), 4.10 (s, 3H), 3.63 (t,  $J$  = 6.6 Hz, 2H);  $^{13}\text{C}$  NMR (151 MHz, DMSO- $d_6$ ):  $\delta$  165.0, 154.7, 152.4, 149.3, 147.4, 146.6, 140.9, 135.9, 129.5, 129.1, 128.3, 126.5, 124.5, 123.9, 123.4 (2), 123.1 (2), 122.4, 120.9, 116.9, 115.9, 110.2, 102.8, 56.9, 55.7, 25.9; HRMS: calcd for

$C_{27}H_{20}N_3O_4Cl$   $[M-Cl]^+$ : 450.1448, found: 450.1449.

*1,2-Methylenedioxy-8-(1,5-dimethylpyrazole-3-carbonylamino)-9-methoxycycloberberine chloride (9d)*. The title compound was prepared from compound **8** (100 mg, 1.0 mmol) and 1,5-dimethylpyrazole-3-carbonyl chloride (376  $\mu$ L, 3.12 mmol) with pyridine (567  $\mu$ L, 7.02 mmol) at 91 °C for 48 h using the above procedure to obtain compound **9d** as a red solid, yield: 33%; Mp: 228 °C (dec.);  $^1H$  NMR (600 MHz, DMSO- $d_6$ ):  $\delta$  10.07 (s, 1H), 9.93 (s, 1H), 9.00–8.97 (m, 1H), 8.84–8.81 (m, 1H), 8.30–8.26 (m, 1H), 8.16–8.14 (m, 1H), 7.58 (s, 1H), 6.66 (s, 1H), 6.39 (s, 2H), 5.26 (t,  $J$  = 6.6 Hz, 2H), 4.06 (s, 3H), 3.92 (s, 3H), 3.62 (t,  $J$  = 6.6 Hz, 2H), 2.37 (s, 3H);  $^{13}C$  NMR (151 MHz, DMSO- $d_6$ ):  $\delta$  161.1, 154.5, 147.7, 146.5, 143.8, 140.8, 140.7, 129.1, 128.0, 126.4, 124.3, 123.9, 123.2, 122.9, 122.8, 122.2, 120.7, 116.8, 115.8, 110.2, 106.3, 102.8, 56.8, 55.7, 36.5, 26.0, 10.7; HRMS: calcd for  $C_{27}H_{23}N_4O_4Cl$   $[M-Cl]^+$ : 467.1714, found: 467.1716.

*1,2-Methylenedioxy-8-(1,2,3-thiadiazole-4-carbonylamido)-9-methoxycycloberberine chloride (9e)*. The title compound was prepared from compound **8** (100 mg, 1.0 mmol) and 1,2,3-thiadiazole-4-carbonyl chloride (231 mg, 1.56 mmol) with pyridine (189  $\mu$ L, 2.34 mmol) at 45 °C for 2 h using the above procedure to obtain compound **9e** as a red solid, yield: 56%; Mp: 212 °C (dec.);  $^1H$  NMR (600 MHz, DMSO- $d_6$ ):  $\delta$  11.25 (s, 1H), 10.17 (s, 1H), 10.00 (s, 1H), 9.09 (d,  $J$  = 9.6 Hz, 1H), 8.88 (d,  $J$  = 9.6 Hz, 1H), 8.35 (d,  $J$  = 9.6 Hz, 1H), 8.19 (d,  $J$  = 9.0 Hz, 1H), 7.60 (s, 1H), 6.40 (s, 2H), 5.26 (t,  $J$  = 6.6 Hz, 2H), 4.11 (s, 3H), 3.63 (t,  $J$  = 6.6 Hz, 2H);  $^{13}C$  NMR (151 MHz, DMSO- $d_6$ ):  $\delta$  158.3, 156.8, 154.8, 147.4, 146.6, 143.3, 140.8, 129.3, 128.2, 126.4, 124.5, 124.0,

123.0 (2), 122.8, 122.3, 120.7, 116.8, 115.8, 110.2, 102.8, 56.9, 55.7, 25.9; HRMS: calcd for C<sub>24</sub>H<sub>17</sub>N<sub>4</sub>O<sub>4</sub>Cl [M-Cl]<sup>+</sup>: 457.0965, found: 457.0973.

*1,2-Methylenedioxy-8-(3,5-dimethylisoxazole-4-carbonylamido)-9-methoxycycloberberine chloride (9f)*. The title compound was prepared from **8** (100 mg, 1.0 mmol) and 3,5-dimethylisoxazole-4-carbonyl chloride (231 mg, 1.56 mmol) with pyridine (630 μL, 7.80 mmol) at 71 °C for 10 h using the above procedure to obtain **9f** as an orange solid, yield: 39%; Mp: 279 °C (dec.); <sup>1</sup>H NMR (600 MHz, DMSO-*d*<sub>6</sub>): δ 10.08 (s, 1H), 10.01 (s, 1H), 9.16 (d, *J* = 9.0 Hz, 1H), 8.97 (d, *J* = 9.6 Hz, 1H), 8.38 (d, *J* = 9.0 Hz, 1H), 8.26 (d, *J* = 9.6 Hz, 1H), 7.62 (s, 1H), 6.42 (s, 2H), 5.30 (t, *J* = 6.6 Hz, 2H), 4.13 (s, 3H), 3.65 (t, *J* = 6.6 Hz, 2H), 2.74 (s, 3H), 2.48 (s, 3H); <sup>13</sup>C NMR (151 MHz, DMSO-*d*<sub>6</sub>): δ 171.0, 161.6, 158.8, 154.5, 147.4, 146.7, 140.9, 129.4, 128.3, 126.5, 124.5, 123.8, 123.2, 123.1, 122.8, 122.4, 120.9, 117.0, 115.9, 112.5, 110.3, 102.8, 57.0, 55.8, 26.0, 12.6, 10.8; HRMS: calcd for C<sub>27</sub>H<sub>22</sub>N<sub>3</sub>O<sub>5</sub>Cl [M-Cl]<sup>+</sup>: 468.1554, found: 468.1552.

### **Antimicrobial Assays in vitro**

Minimum inhibitory concentrations (MICs) of the target compounds were determined by using the agar dilution assay at various concentrations of 64.0, 32.0, 16.0, 8.0, 4.0, 2.0, 1.0, 0.5, 0.25, 0.125, 0.06 and 0.03 mg/mL described by the Clinical Laboratory Standards Institute. Organisms used in this study included strains from the ATCC collection and clinical isolates from Chinese hospitals. The test medium was Mueller-Hinton agar, and the inoculum was 10<sup>4</sup> colony forming units (cfu)/spot. Culture plates were incubated at 35 °C for 18 h, and MICs were defined as

the lowest concentrations that prevented visible growth of the bacteria.

### **Blood Stability Assay**

The fresh blood were collected from SD rat on the day of experiment and pre-warmed at 37 °C in a water bath. Compounds **2**, **5d** and **9e** (10 mM) or control (enalapril maleate salt stock solutions) were prepared in DMSO, and then diluted with 45% MeOH/H<sub>2</sub>O to obtain 100 μM dosing solutions. Each dosing solution (2 μL) was incubated with 98 μL of blank blood at 37 °C in water bath. The testing sample was taken out at 0, 30, 60, 120, 240 and 420 min, respectively. At the end of incubation, for each sample, 100 μL water and 800 μL of stop solution (200 ng/mL tolbutamide plus 20 ng/mL buspirone in ACN) were immediately added to precipitate protein and centrifuge at 4,000 rpm for 20 min. An aliquot of supernatant (100 μL) was then extracted, mixed with 200 μL H<sub>2</sub>O and then shook at 800 rpm for about 10 min before submitting to LC-MS/MS analysis. The experiment was repeated two times.

### **Cytotoxicity Assay**

Cell suspensions (100 μL) of A549 cells at concentration of 50% confluence were seeded into the 96-well plates, and then were treated with various concentrations of compounds **2**, **5d** and **9e**. After 24 h of incubation, 20 μL of the MTT (1 mg/mL) solution was added into each plate and incubated for 4 h at 37 °C, 5% CO<sub>2</sub>. Subsequently, the culture supernatant was replaced with 150 μL DMSO to dissolve the formazan crystal made from succinic dehydrogenase in the mitochondria and its substrate MTT. The optical density (OD) at 550 and 630 nm were measured using a microplate reader. The net absorbance (OD<sub>630</sub>–OD<sub>550</sub>) indicates the enzymatic



activity of mitochondria and provides information on cell viability.

### **DNA-cleaving Assay**

The DNA cleavage experiments were conducted by using the Agarose gel electrophoresis (GEP). *Escherichia coli* (*E. coli*) expression vector (pET-32a vector) was purchased from Novagen. The plasmid pET-32a was transformed into *E. coli* DH5-alpha and *E. coli* cells were grown in Luria-Bertani (LB) broth or on agar at 37 °C supplemented with the following antibiotics as appropriate: Ampicillin at 100 µg/mL. The plasmid was extracted by using plasmid extraction kit (Tiangen, Beijing, China). Typically, a mixture of pET-32a DNA (7 µL) and compound **9e** (6 µL) of varying concentrations (61.5, 123, 246 and 492 µg/mL) in DMSO and incubated at 37 °C for 4 h. The solution was then loaded on 1% agarose gel containing ethidium bromide (EB) (1.0 mg/L). Bands were visualized by UV light and photographed.

<sup>1</sup>H NMR, <sup>13</sup>C NMR, HRMS-ESI spectra of all the target compounds

# Compound 5a:

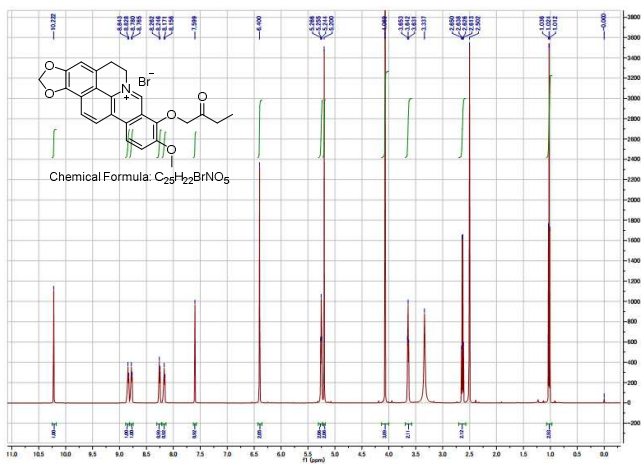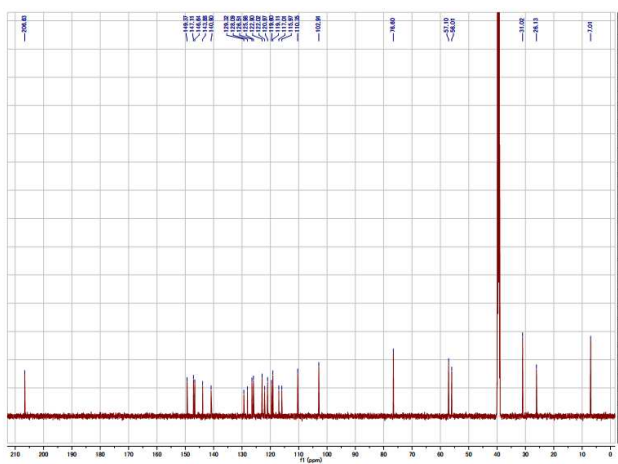

E:\2017\...\5a170711181300

7/11/2017 6:13:00 PM

5a

5a\_170711181300 #3-4 RT: 0.08-0.11 AV: 2 NL: 8.10E6

T: FTMS + c ESI Full ms [50.00-1000.00]

416.14806  
 $C_{25}H_{22}O_5N = 416.14925$   
 15.5 RDBE  
 -2.85810 ppm

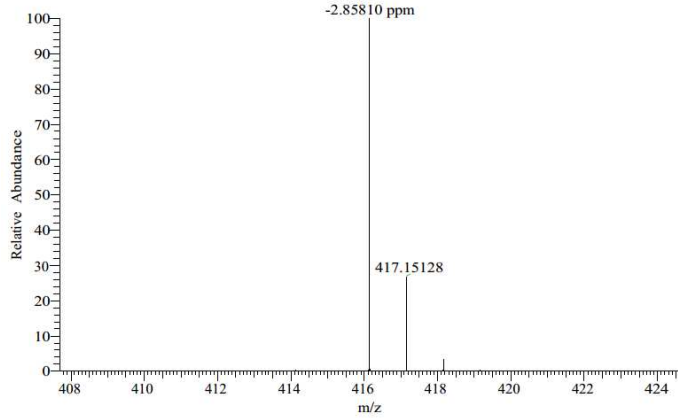

# Compound 5b:

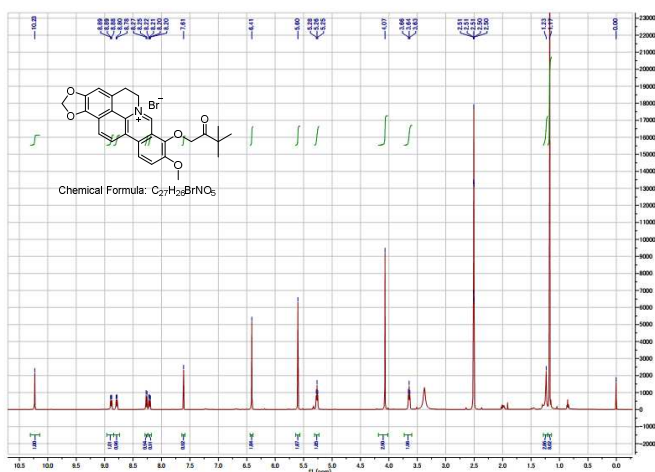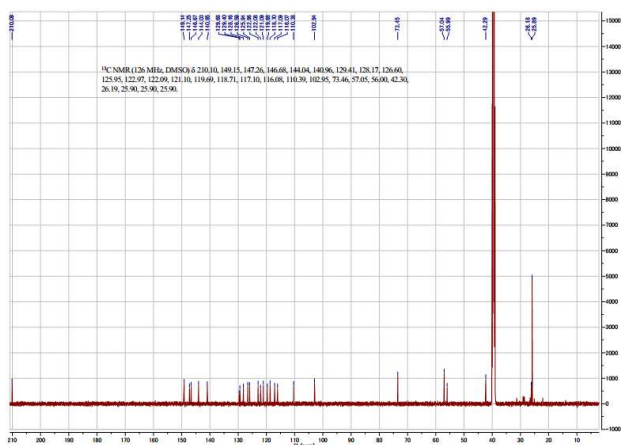

E:\2017\HRMS\20170711\zengqingxuan\5b

7/11/2017 5:58:57 PM

5b

5b #16-23 RT: 0.44-0.64 AV: 8 NL: 4.08E7  
T: FTMS + c ESI Full ms [50.00-1000.00]

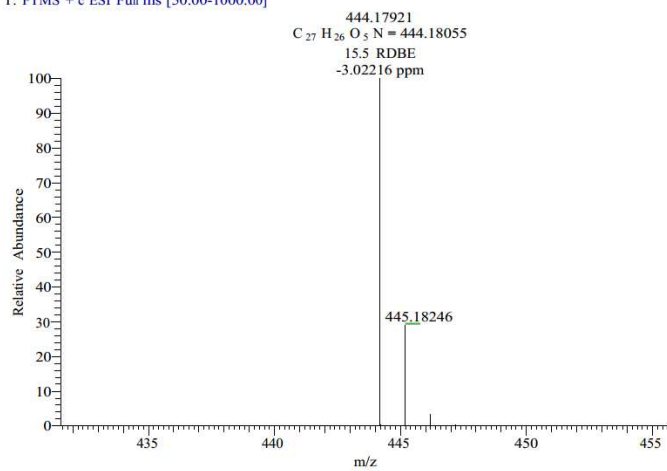

# Compound 5c:

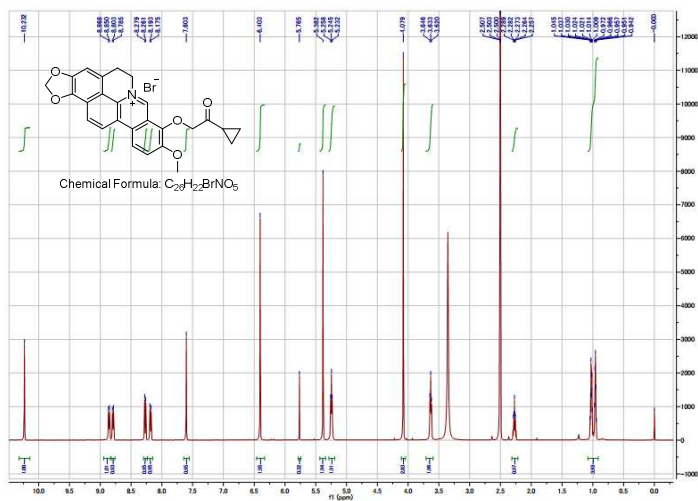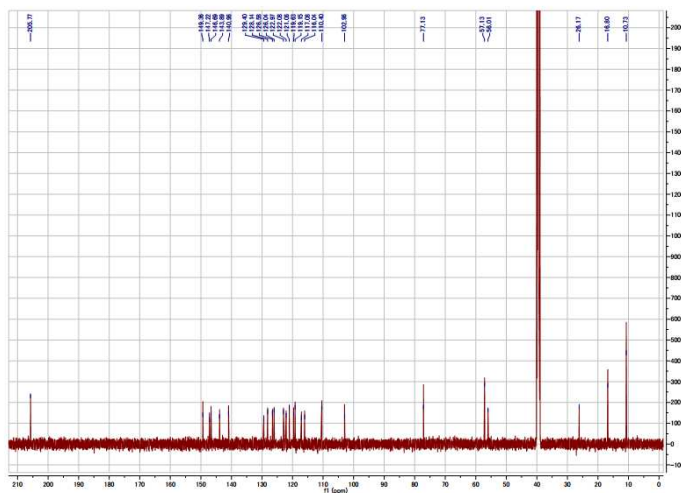

E:\2017\HRMS\20170711\zengqingxuan\5c 7/11/2017 5:57:38 PM 5c

5c #13-21 RT: 0.36-0.58 AV: 9 NL: 3.80E7  
T: FTMS + c ESI Full ms [50.00-1000.00]

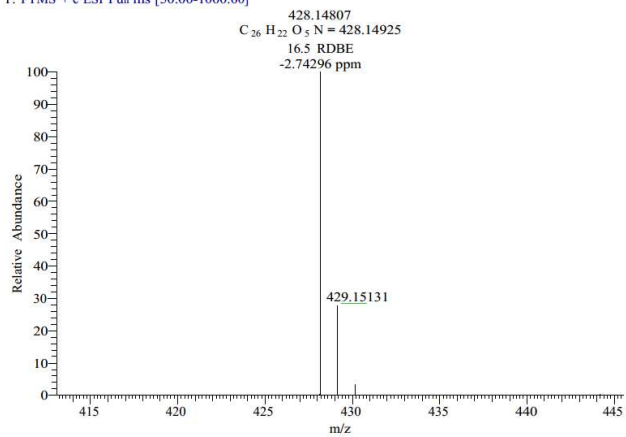

Compound 5d:

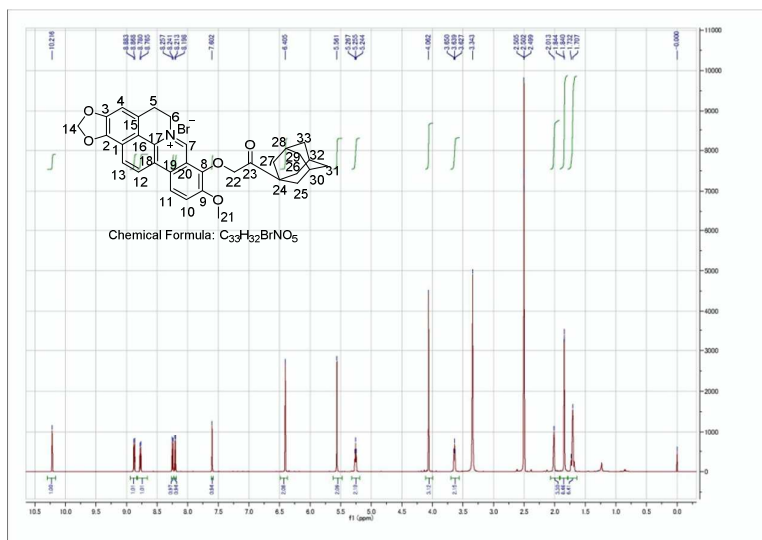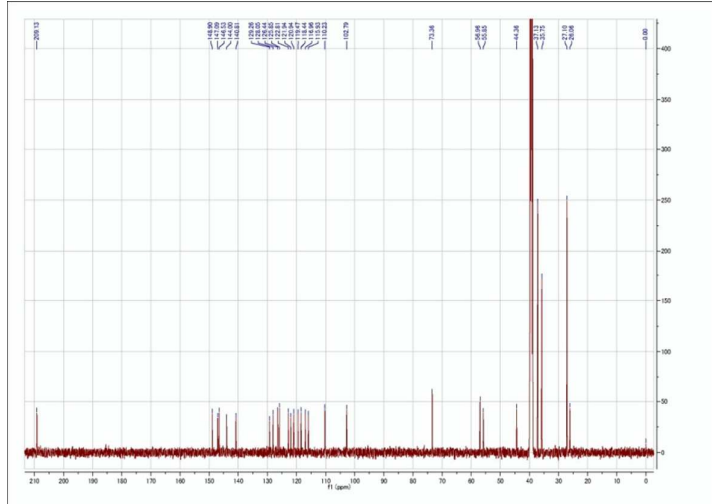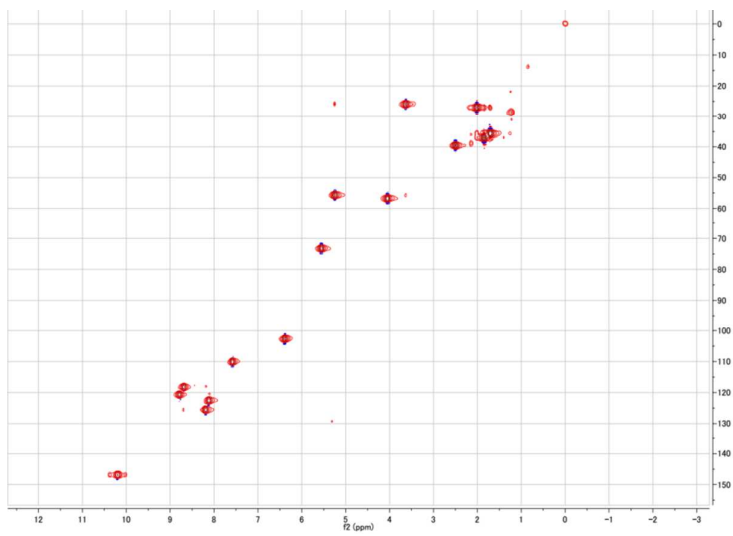

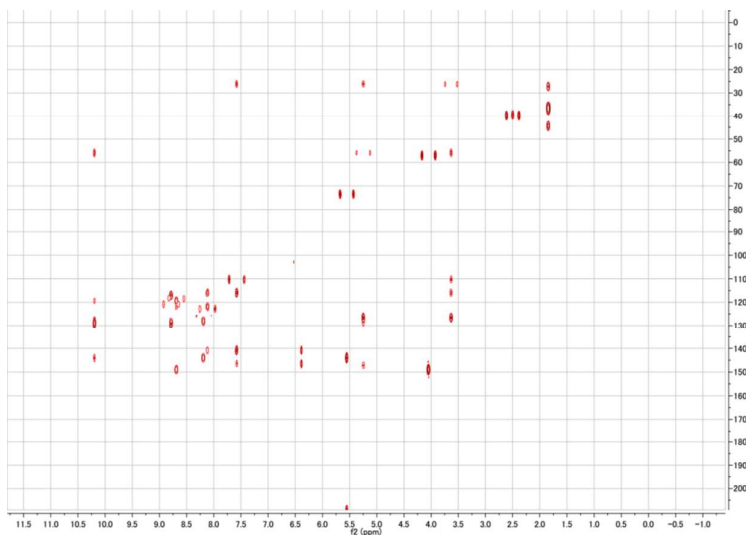

E:\2017\HRMS\20170711\fantianyun\5d

7/11/2017 6:01:05 PM

5d

5d #15-17 RT: 0.40-0.46 AV: 3 NL: 3.26E7

T: FTMS + c ESI Full ms [50.00-1000.00]

522.22565  
 $C_{33}H_{32}O_5N = 522.22750$   
 18.5 RDBE  
 -3.54748 ppm

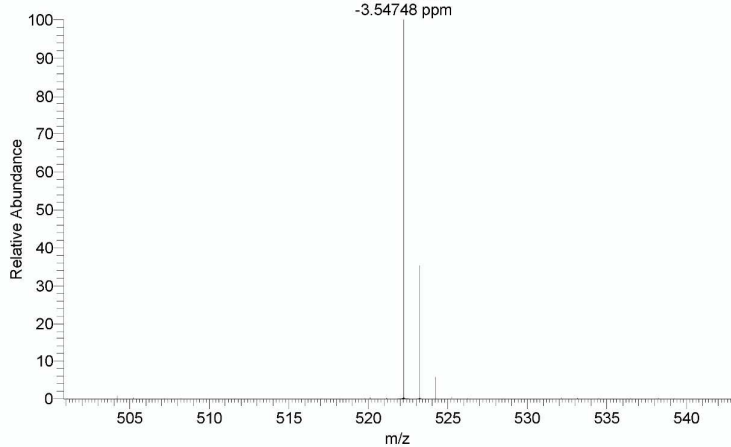

| proton | $^{13}C$ NMR chemical shift values | $^1H$ NMR chemical shift values |
|--------|------------------------------------|---------------------------------|
| 1      | 121.9                              |                                 |
| 2      | 140.8                              |                                 |
| 3      | 146.5                              |                                 |
| 4      | 110.2                              | 7.60 s                          |
| 5      | 26.1                               | 3.64 t                          |
| 6      | 55.9                               | 5.26 t                          |
| 7      | 147.1                              | 10.22 s                         |
| 8      | 144.0                              |                                 |
| 9      | 148.9                              |                                 |
| 10     | 125.9                              | 8.21 d                          |
| 11     | 118.4                              | 8.77 d                          |

|    |       |        |
|----|-------|--------|
| 12 | 120.9 | 8.88 d |
| 13 | 122.8 | 8.25 d |
| 14 | 102.8 | 6.41 s |
| 15 | 115.9 |        |
| 16 | 126.4 |        |
| 17 | 128.1 |        |
| 18 | 117.0 |        |
| 19 | 129.3 |        |
| 20 | 119.4 |        |
| 21 | 57.0  | 4.06 s |
| 22 | 73.4  | 5.56 s |
| 23 | 209.1 |        |
| 24 | 44.4  |        |
| 25 | 37.1  | 1.84 d |
| 26 | 37.1  | 1.84 d |
| 27 | 37.1  | 1.84 d |
| 28 | 27.1  | 2.01 s |
| 29 | 35.8  | 1.71 m |
| 30 | 27.1  | 2.01 s |
| 31 | 35.8  | 1.71 m |
| 32 | 27.1  | 2.01 s |
| 33 | 35.8  | 1.71 m |

# Compound 5e:

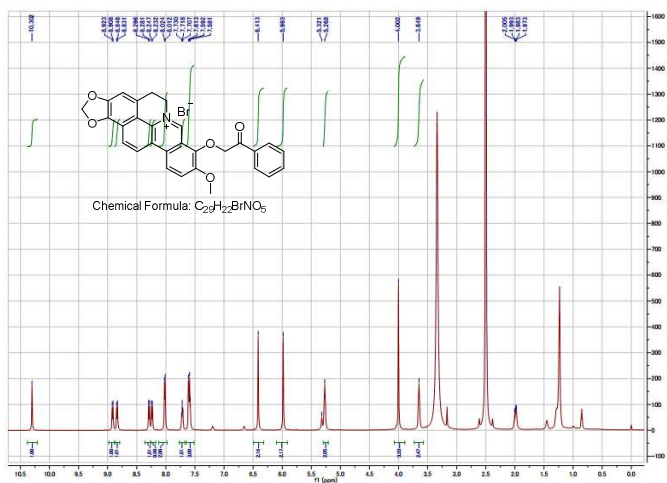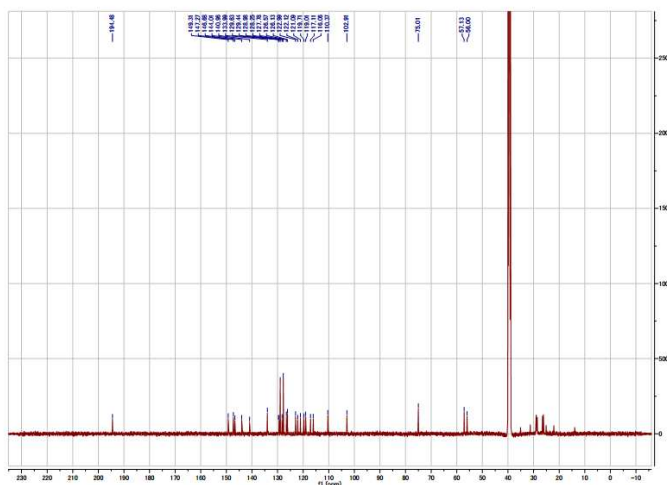

E:\2017\HRMS\0418\F\5e

4/18/2017 10:21:20 AM

5e

5e #9-10 RT: 0.13-0.15 AV: 2 NL: 2.86E8  
T: FTMS + c ESI Full ms [100.00-1000.00]

464.14998  
 $C_{29}H_{27}O_5N$  = 464.14925  
19.5 RDBE  
1.57758 ppm

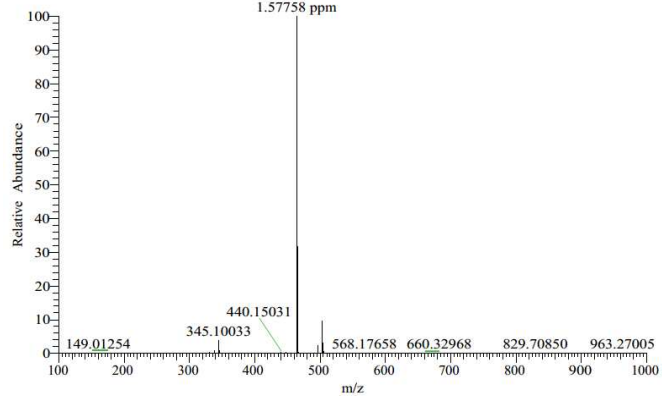



# Compound 5f:

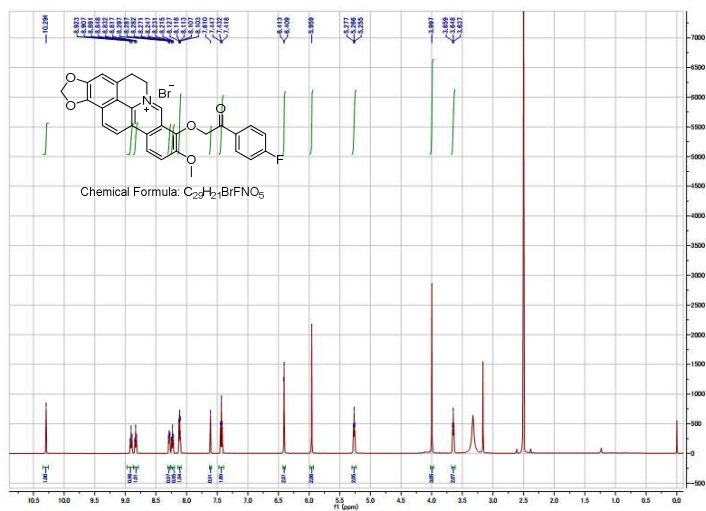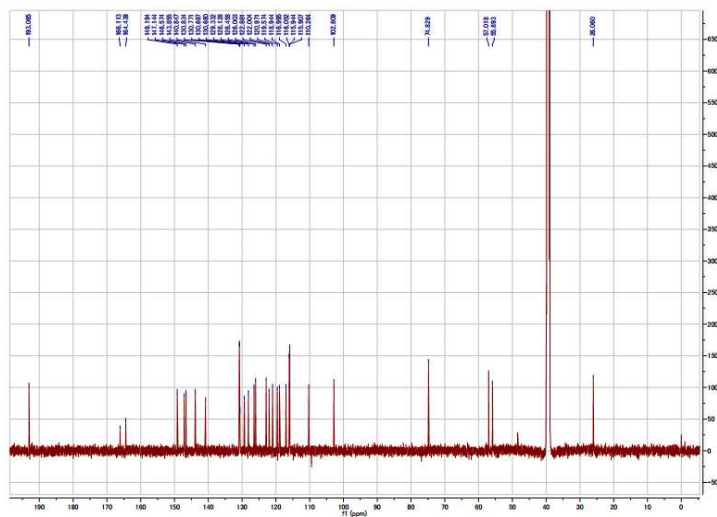

E:\2017\HRMS\20170711\zengqingxuan\5f

7/11/2017 5:55:09 PM

5f

5f #16-25 RT: 0.44-0.70 AV: 10 NL: 1.69E7  
T: FTMS + c ESI Full ms [50.00-1000.00]

482.13817  
 $C_{29}H_{21}O_3NF = 482.13983$   
19.5 RDBE  
-3.44640 ppm

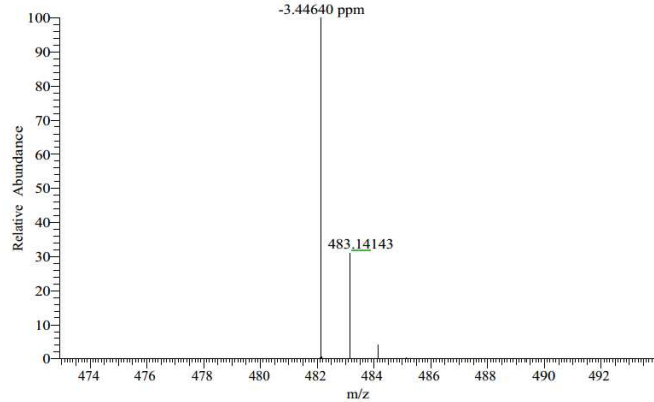

# Compound 5g:

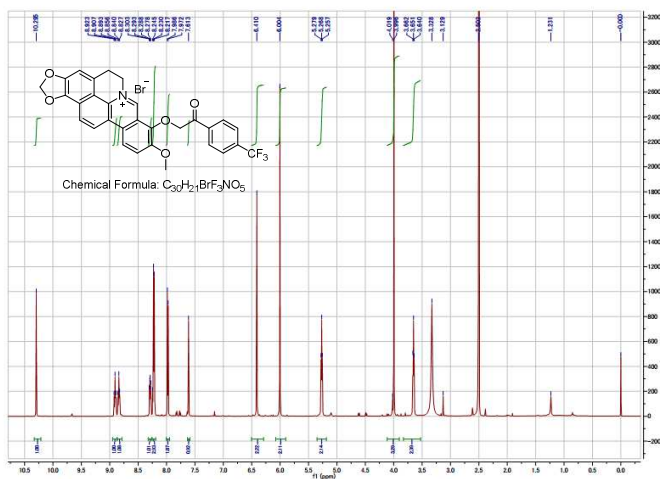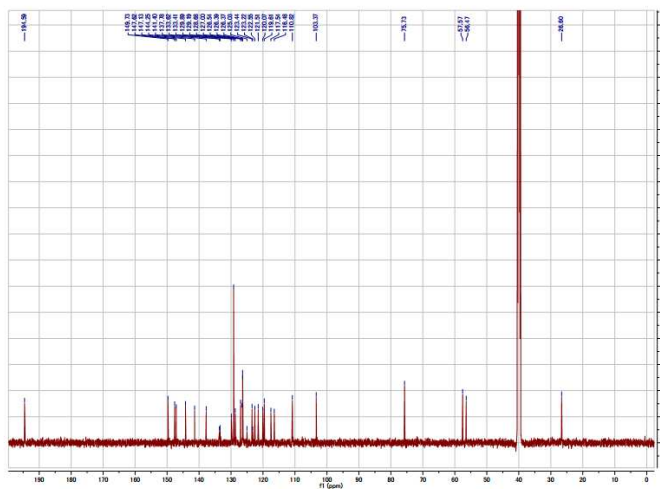

E:\2017\HRMS\20170711\zengqingxuan\5g

7/11/2017 5:52:19 PM

5g

5g #7-9 RT: 0.18-0.23 AV: 3 NL: 8.98E6  
T: FTMS + c ESI Full ms [50.00-1000.00]

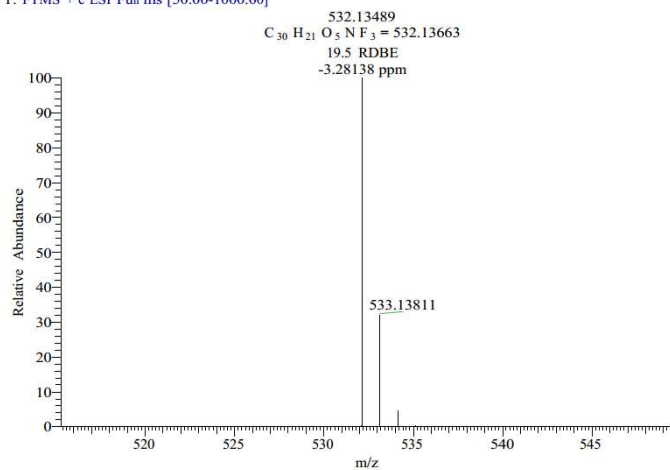

# Compound 5h:

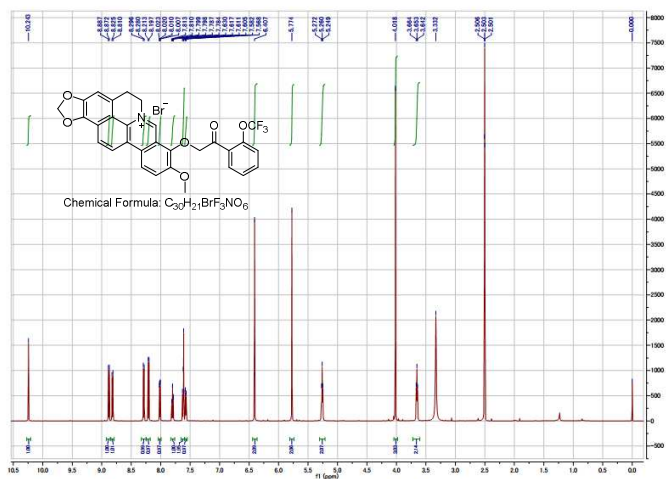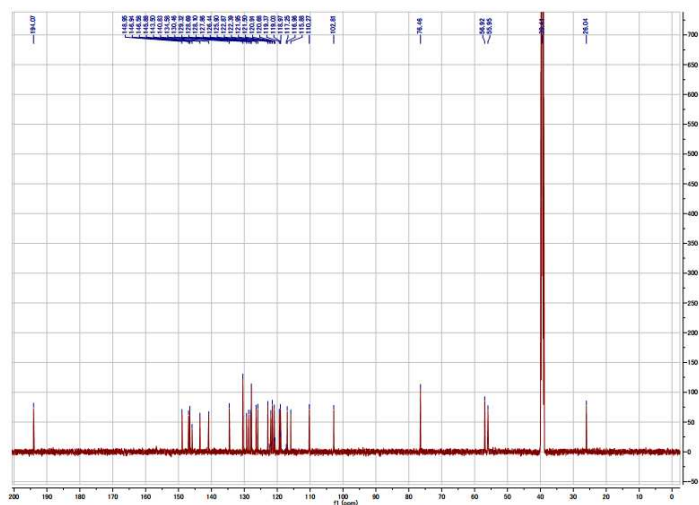

E:\2017\HRMS\20170711\zengqingxuan\5h

7/11/2017 6:02:13 PM

5h

5h #16-19 RT: 0.44-0.52 AV: 4 NL: 1.56E7  
T: FTMS + e ESI Full ms [50.00-1000.00]

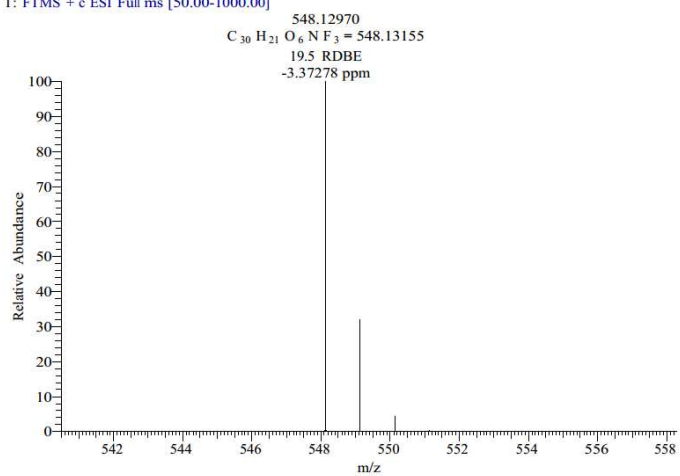

# Compound 5i:

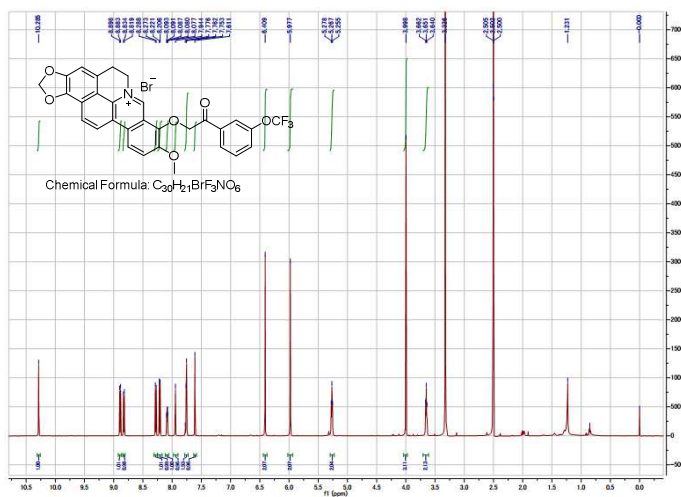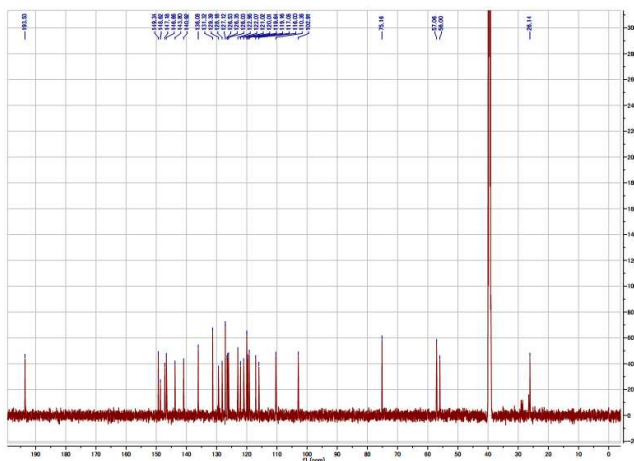

EA\2017\HRMS\20170711\zengqingxuan\5i

7/11/2017 6:03:18 PM

5i

5i #27-30 RT: 0.75-0.83 AV: 4 NL: 8.65E6  
T: FTMS + c ESI Full ms [50.00-1000.00]

548.12964  
 $C_{30}H_{21}O_6N_3F_3 = 548.13155$   
19.5 RDBE  
-3.48414 ppm

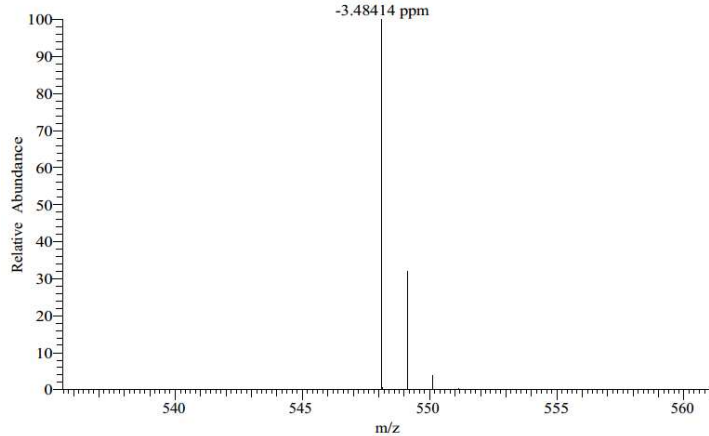

# Compound 5j:

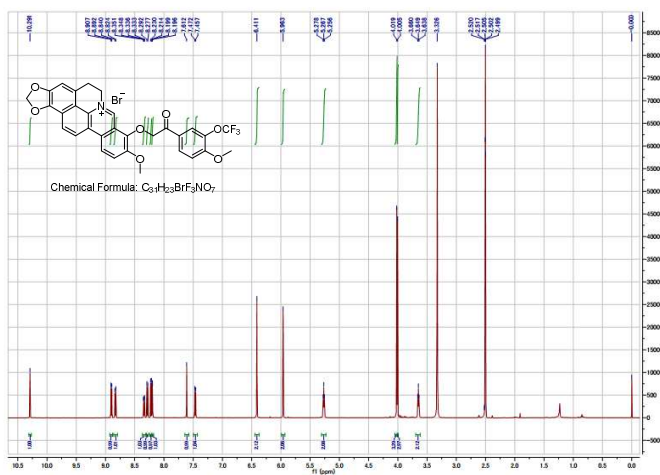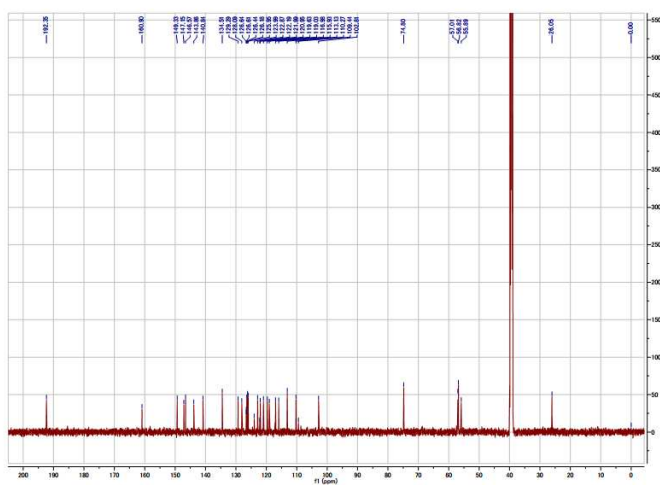

E:\2017\HRMS\20170711\zengqingxuan\5j

7/11/2017 6:04:42 PM

5j

5j #20-27 RT: 0.54-0.74 AV: 8 NL: 7.83E6

T: FTMS + c ESI Full ms [50.00-1000.00]

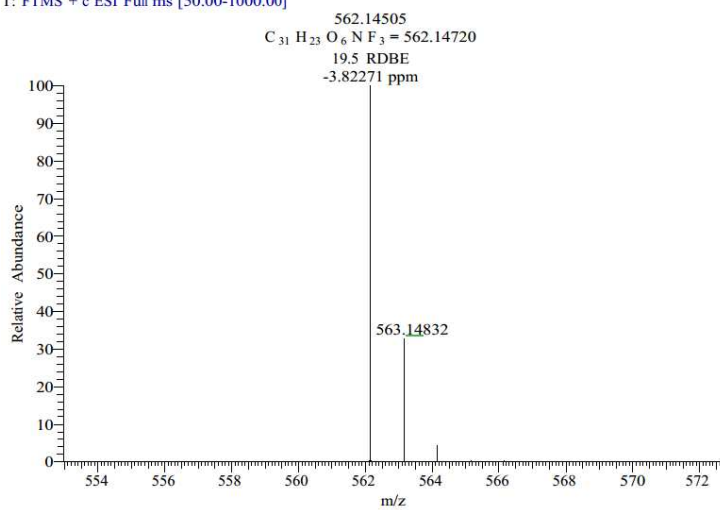

# Compound 5k:

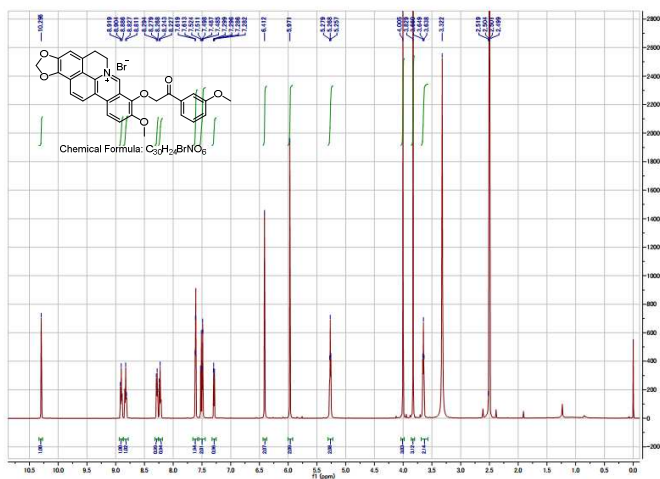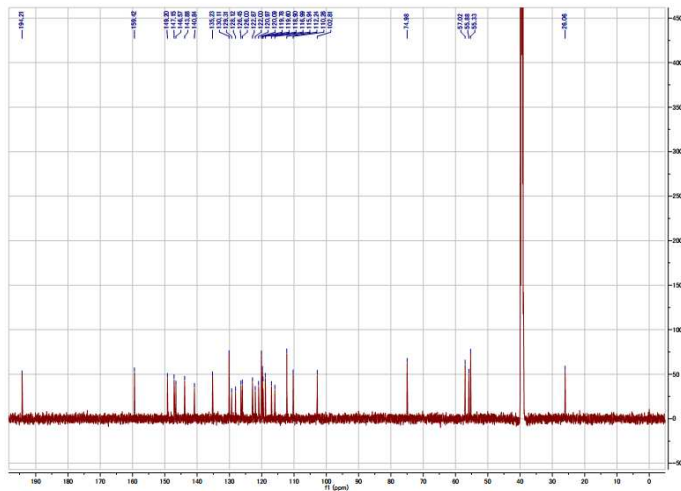

E:\2017\HRMS\20170711\zengqingxuan\5k

7/11/2017 5:56:48 PM

5k

5k #13-21 RT: 0.36-0.59 AV: 9 NL: 1.14E7  
T: FTMS + c ESI Full ms [50.00-1000.00]

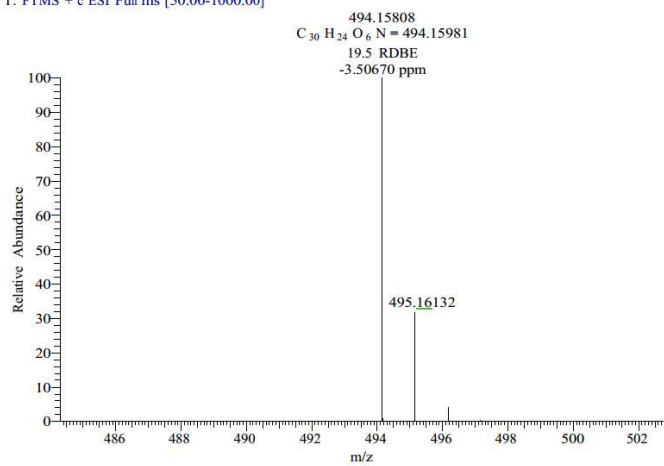

# Compound 51:

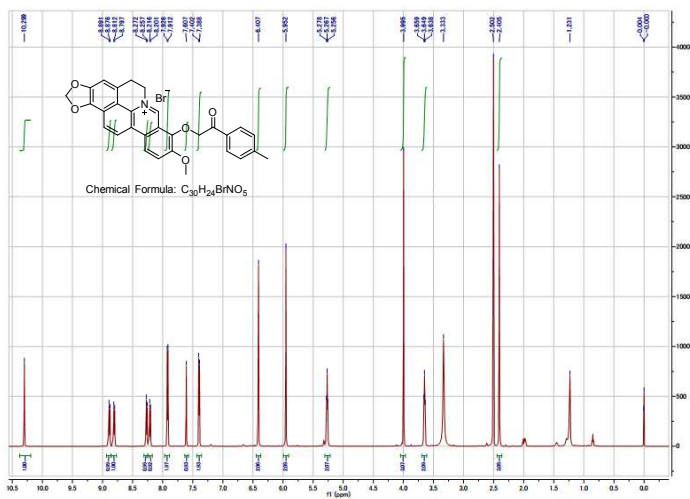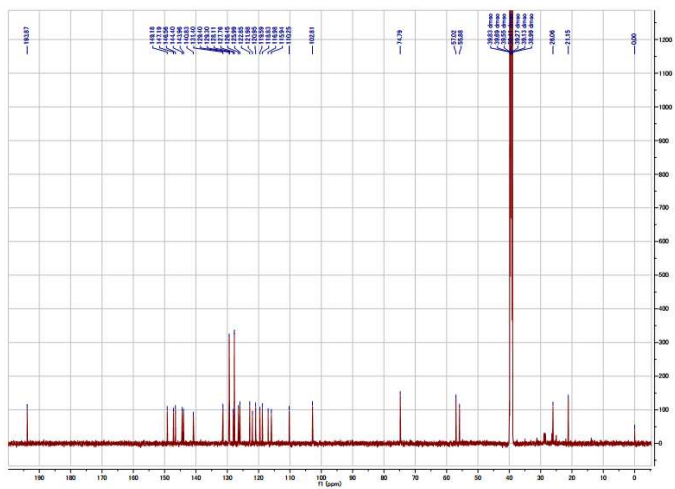

E:\2017\HRMS\0418\F\51 4/18/2017 10:21:47 AM 51

51 #7-10 RT: 0.10-0.14 AV: 4 NL: 3.62E8  
T: FTMS + c ESI Full ms [100.00-1000.00]

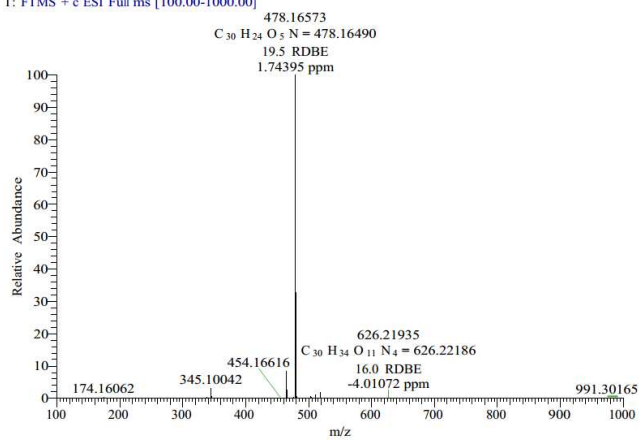

# Compound 6a

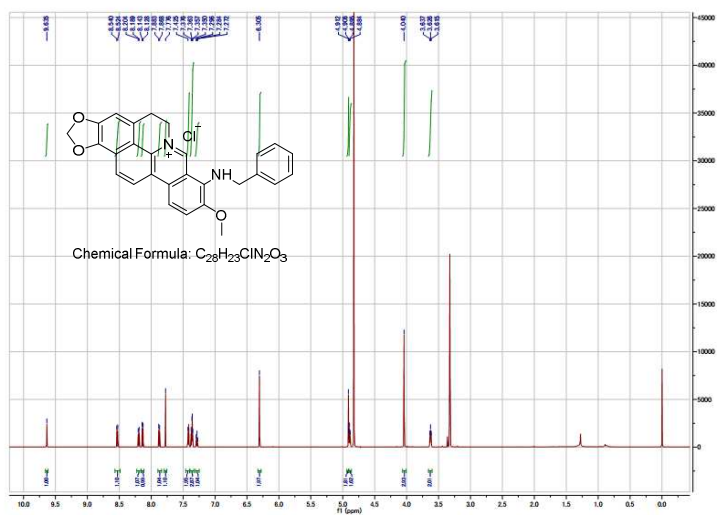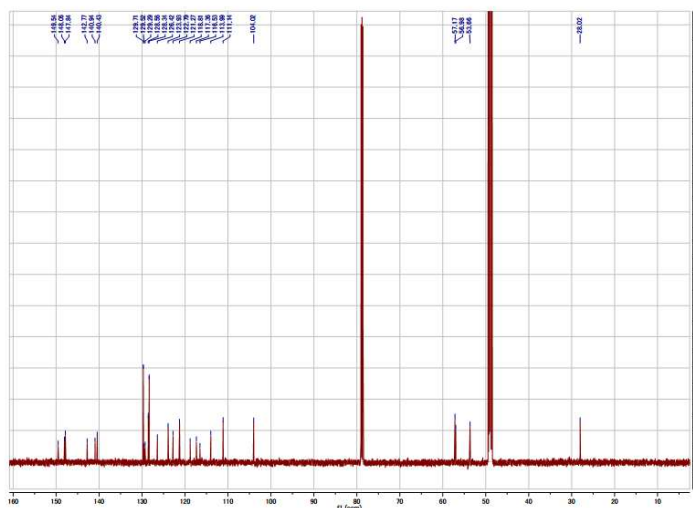

EA2017HRMS20171120\6a

11/20/2017 4:44:25 PM

6a

6a #12 RT: 0.11 AV: 1 NL: 2.71E7  
T: FTMS + c ESI Full ms [100.00-1000.00]

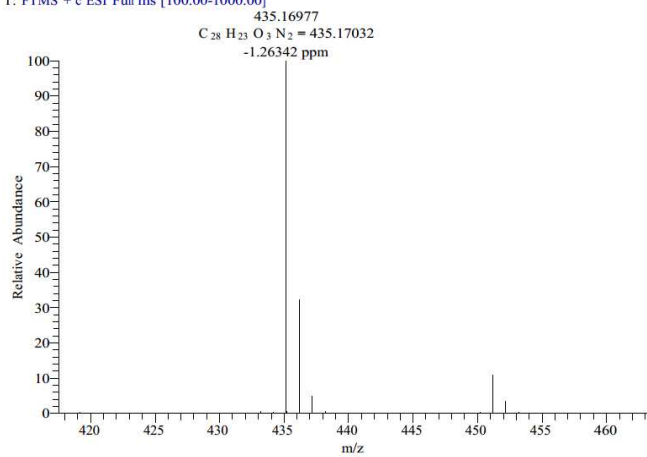



# Compound 6b:

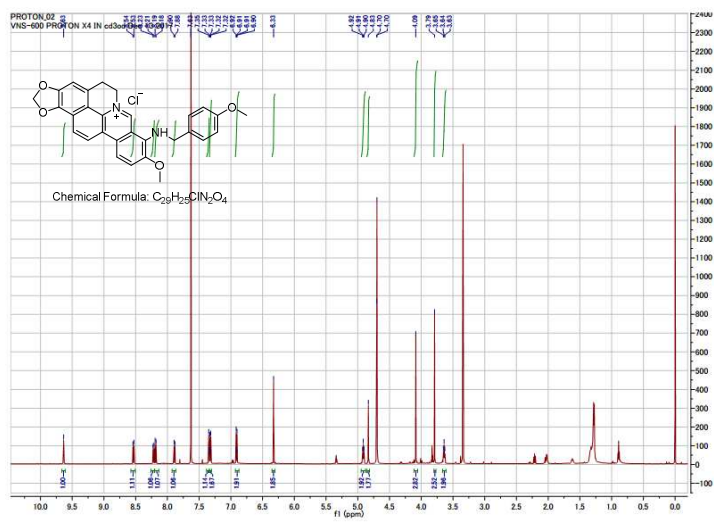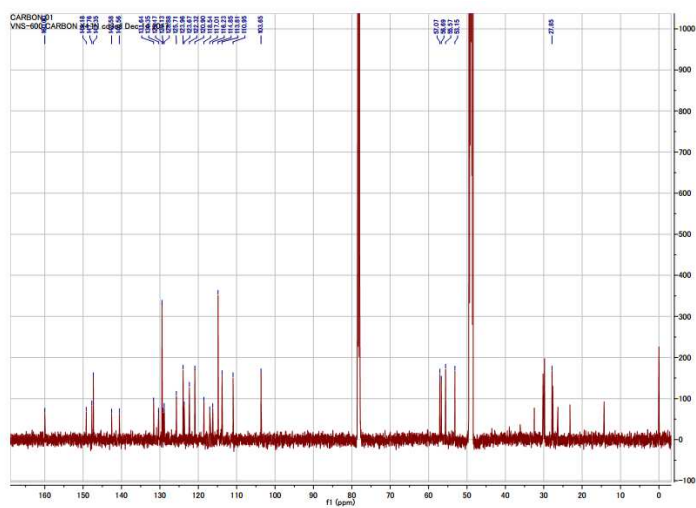

E:\2017\HRMS\20171120\6b

11/20/2017 4:44:49 PM

6b

6b #63 RT: 0.59 AV: 1 NL: 2.22E7

T: FTMS + c ESI Full ms [100.00-1000.00]

465.18011  
C<sub>29</sub>H<sub>25</sub>O<sub>4</sub>N<sub>2</sub> = 465.18088

-1.65313 ppm

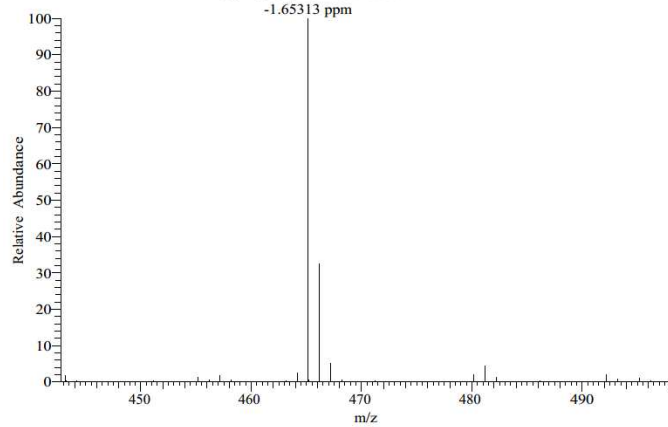

# Compound 6c:

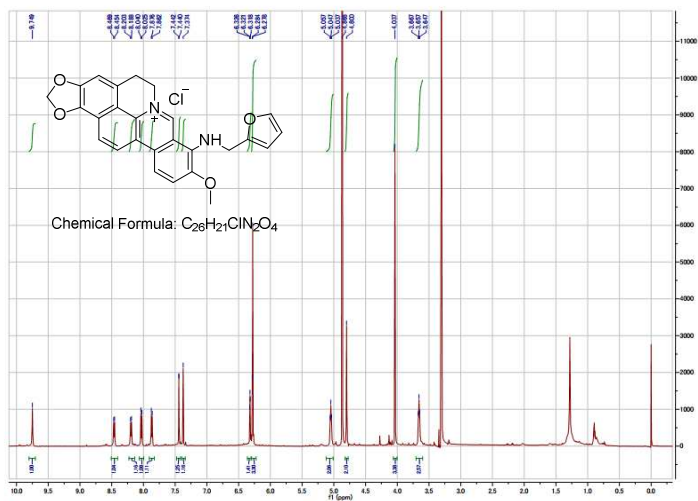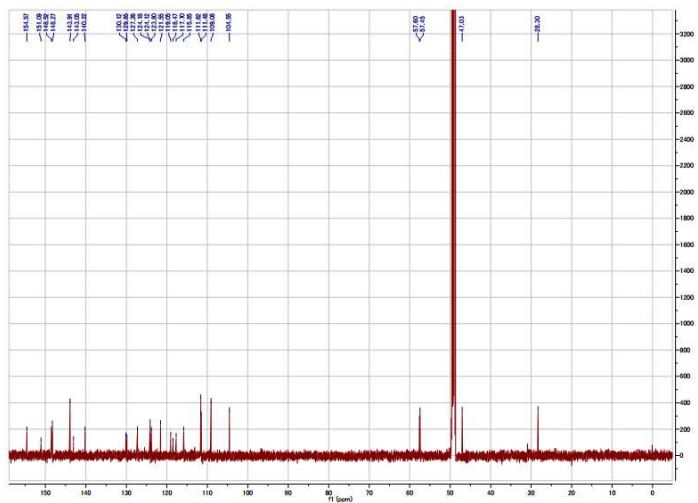

E:\2017\HRMS\20171120\6c\_171120165746 11/20/2017 4:57:46 PM 6c

6c\_171120165746 #52 RT: 0.48 AV: 1 NL: 1.41E7  
T: FTMS + c ESI Full ms [100.00-1000.00]

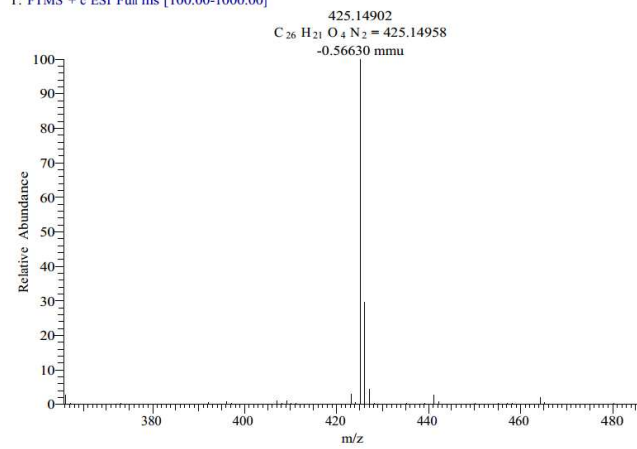

## Compound 7:

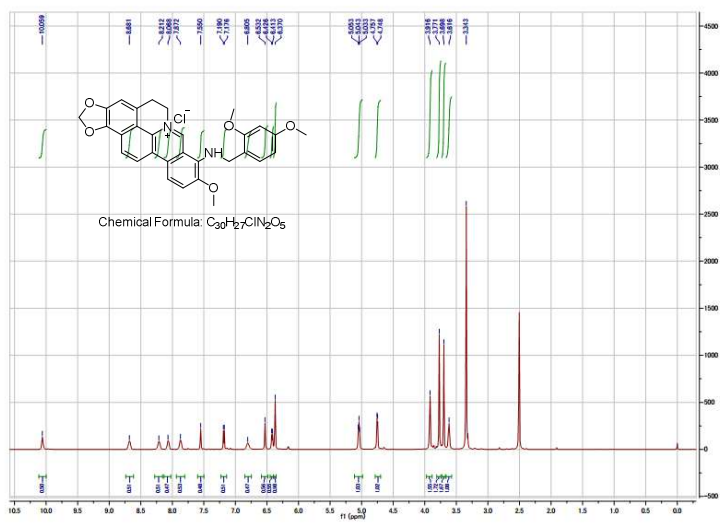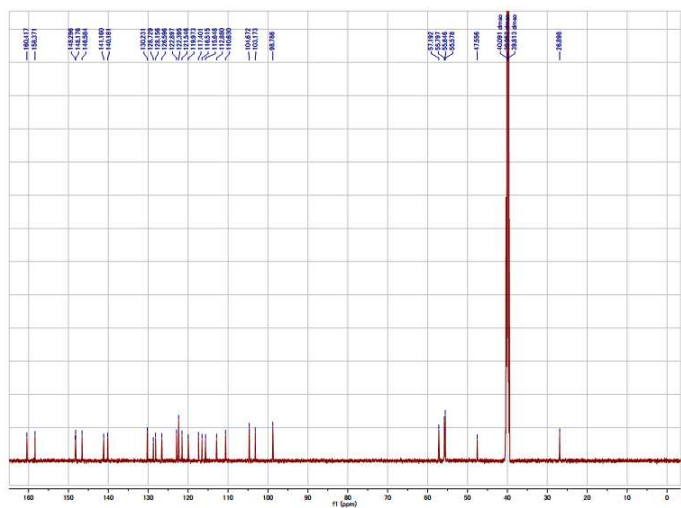

E:\2017\HRMS\0418\F7

4/18/2017 10:22:20 AM

7

7#8-10 RT: 0.11-0.14 AV: 3 NL: 2.66E8  
T: FTMS + c ESI Full ms [100.00-1000.00]

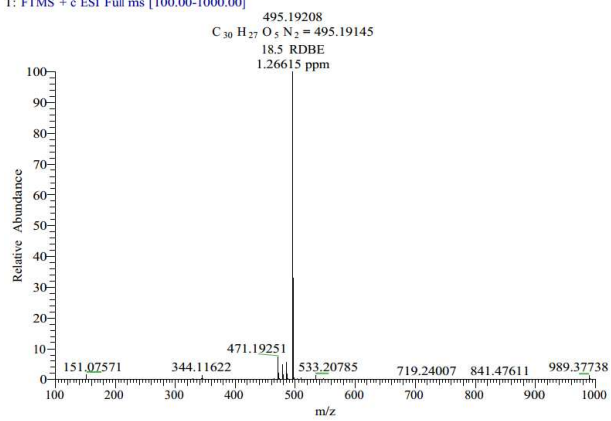

## Compound 8:

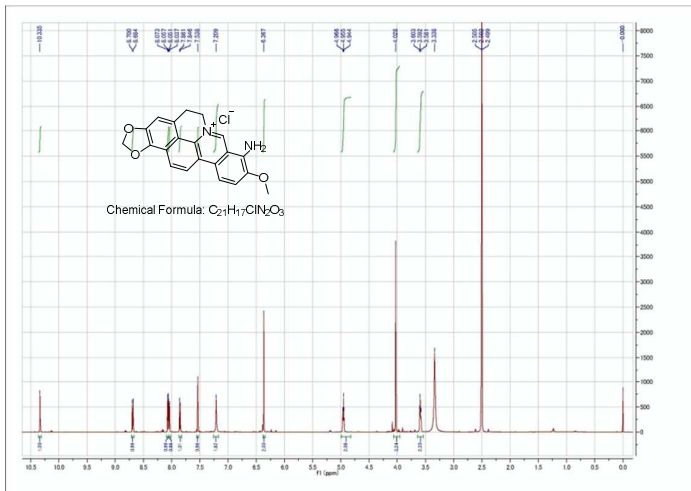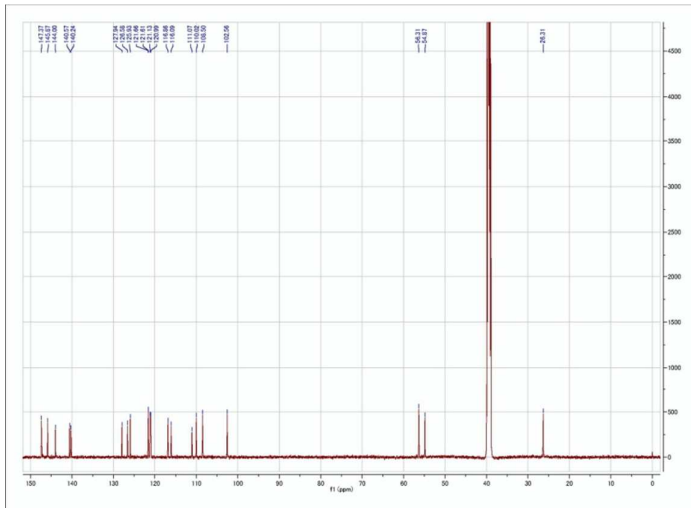

E:\2017\HRMS\fantianyun\F18

4/18/2017 10:27:41 AM

8

8#7-9 RT: 0.11-0.14 AV: 3 NL: 1.56E8

T: FTMS + c ESI Full ms [100.00-1000.00]

345.12369

$C_{21}H_{17}O_3N_2 = 345.12337$

14.5 RDBE

0.94431 ppm

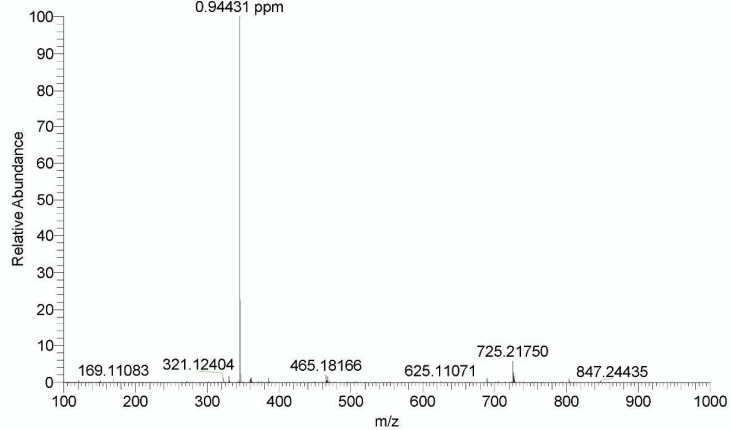

Compound 9a:

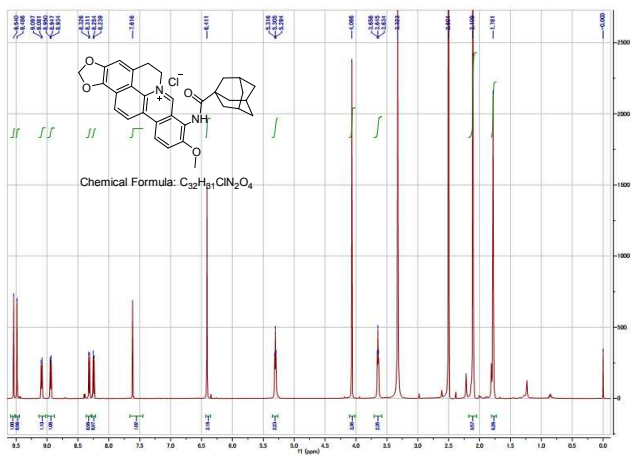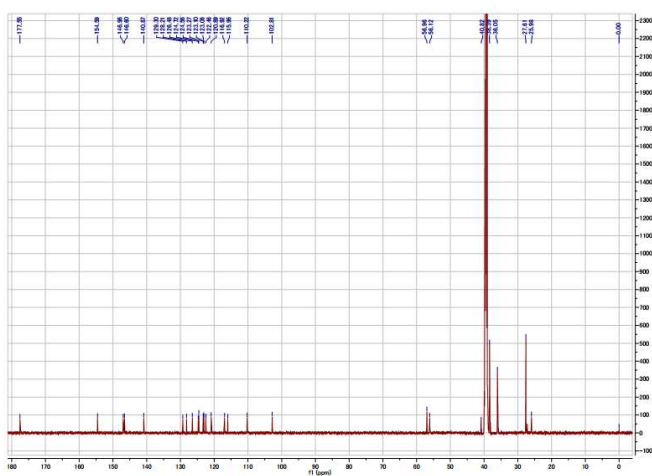

E:\2017\HRMS\0418\F\9a

4/18/2017 10:24:10 AM

9a

9a #9-11 RT: 0.13-0.15 AV: 3 NL: 3.47E8

T: FTMS + c ESI Full ms [100.00-1000.00]

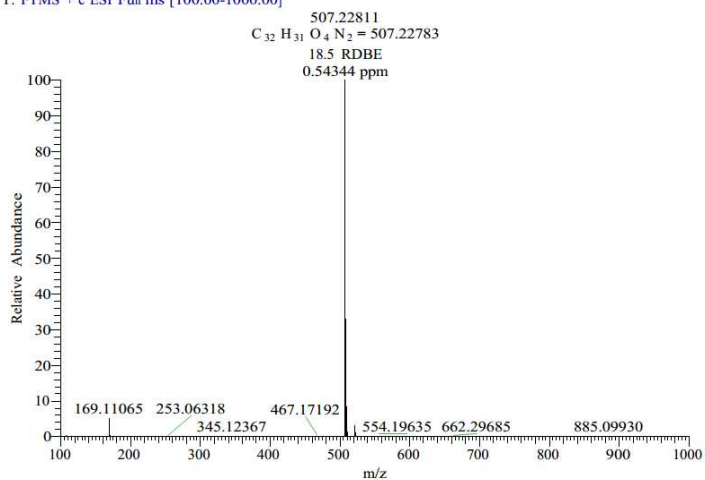

Compound **9b**:

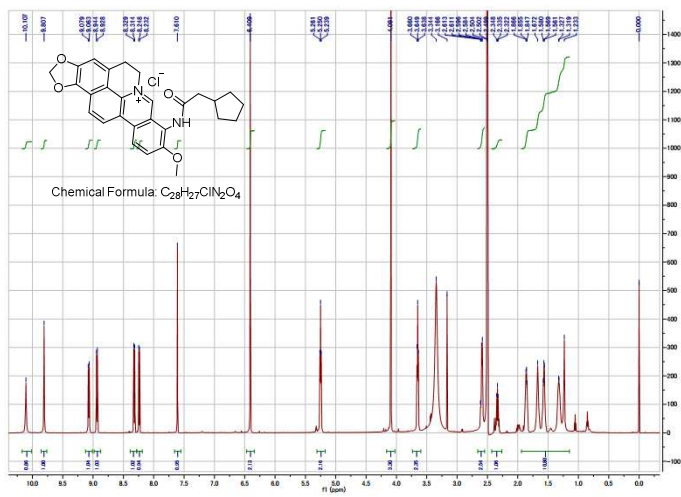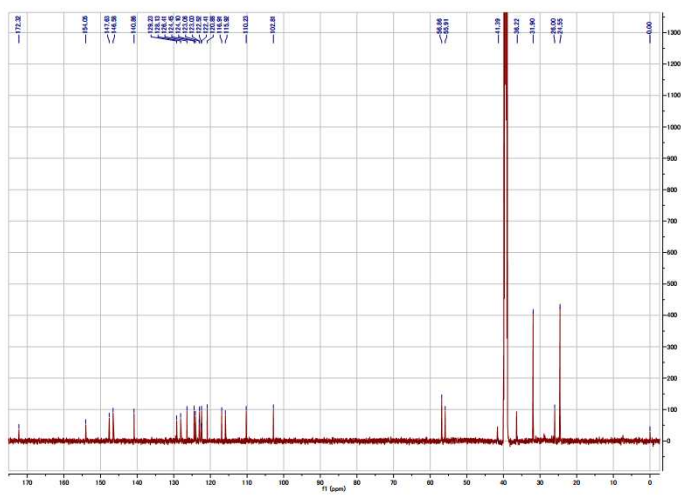

E:\2017\HRMS\20170711\zengqingxuan\9b

7/11/2017 5:35:56 PM

9b

9b #15-18 RT: 0.41-0.49 AV: 4 NL: 1.85E7

T: FTMS + c ESI Full ms [50.00-1000.00]

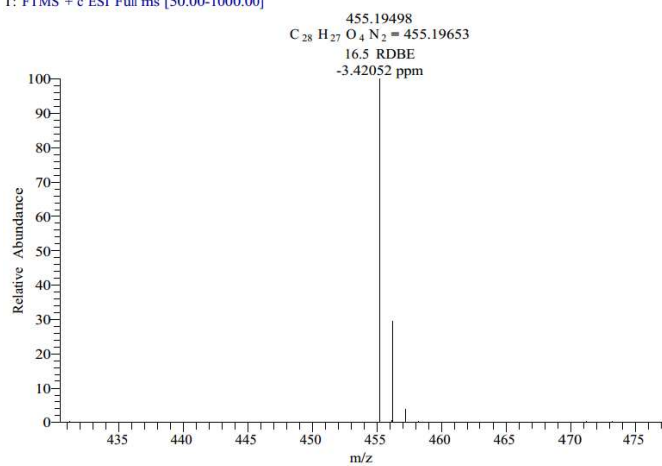

Compound 9c:

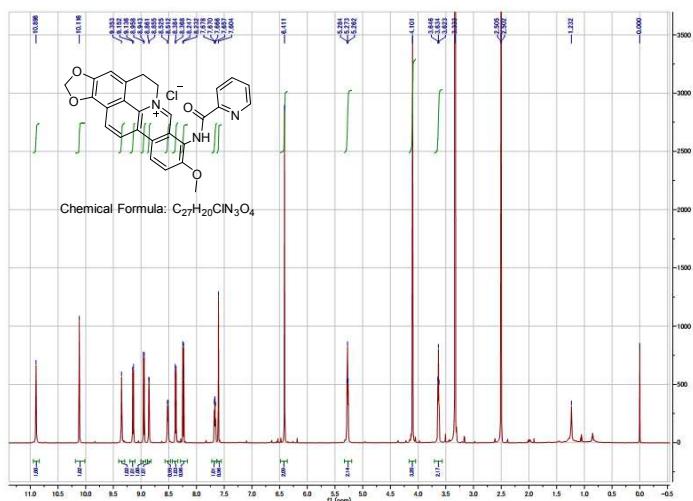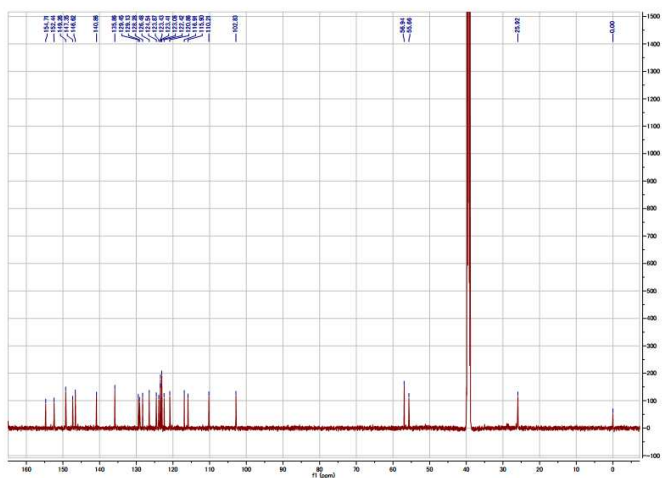

E:\2017\HRMS\0418\F9c

4/18/2017 10:24:40 AM

9c

9c #7-10 RT: 0.10-0.14 AV: 4 NL: 4.01E8

T: FTMS + c ESI Full ms [100.00-1000.00]

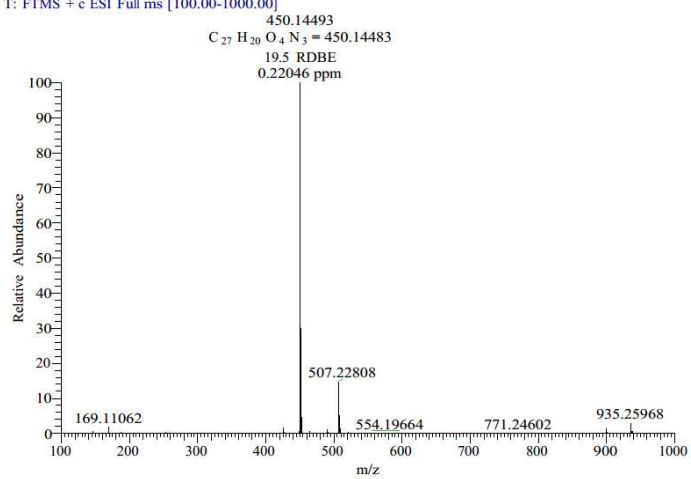

Compound 9d:

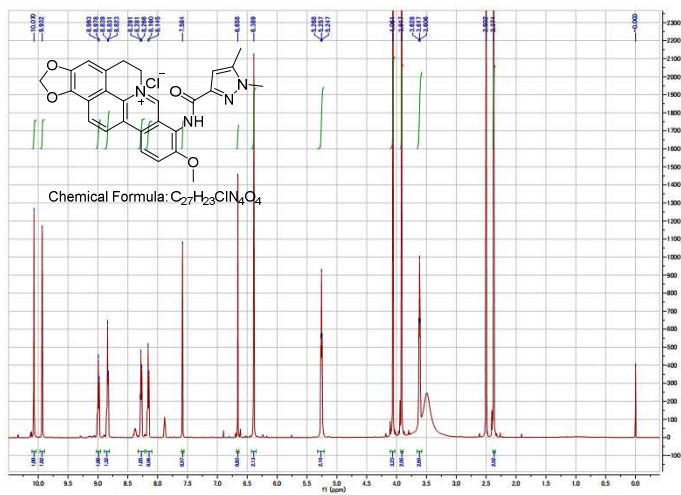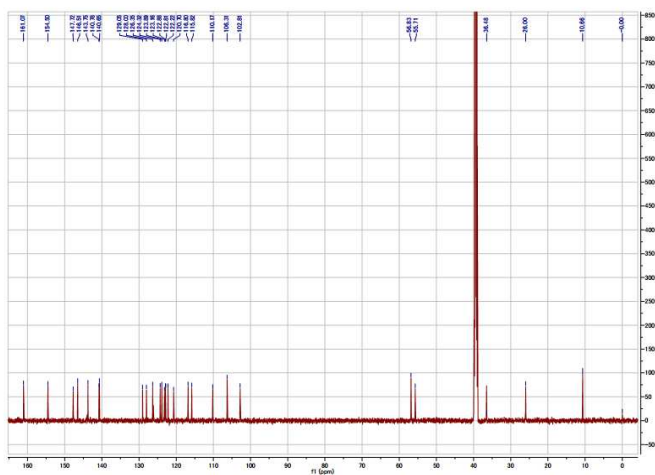

E:\2017\HRMS\0418\F09d

4/18/2017 10:25:21 AM

9d

9d #7-9 RT: 0.10-0.13 AV: 3 NL: 5.38E8

T: FTMS + c ESI Full ms [100.00-1000.00]

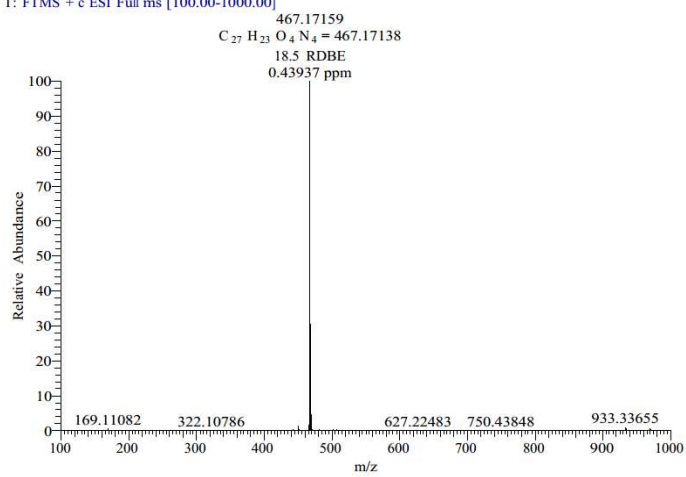

Compound 9e



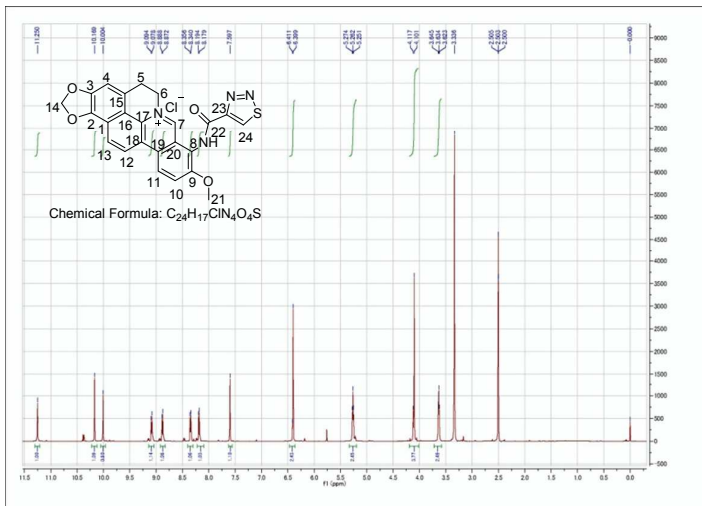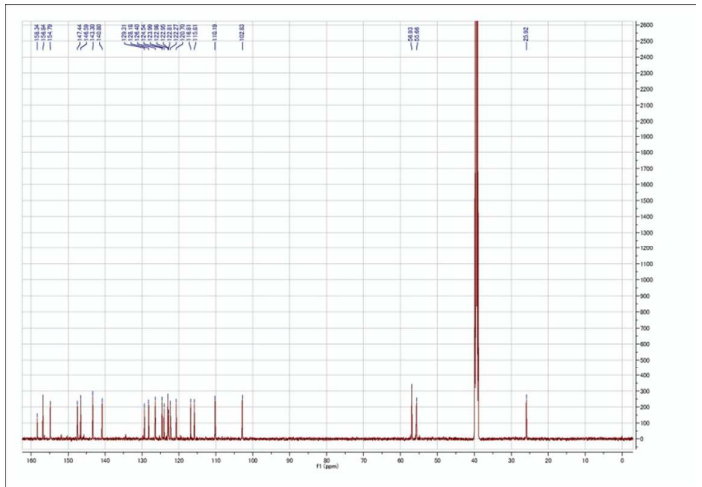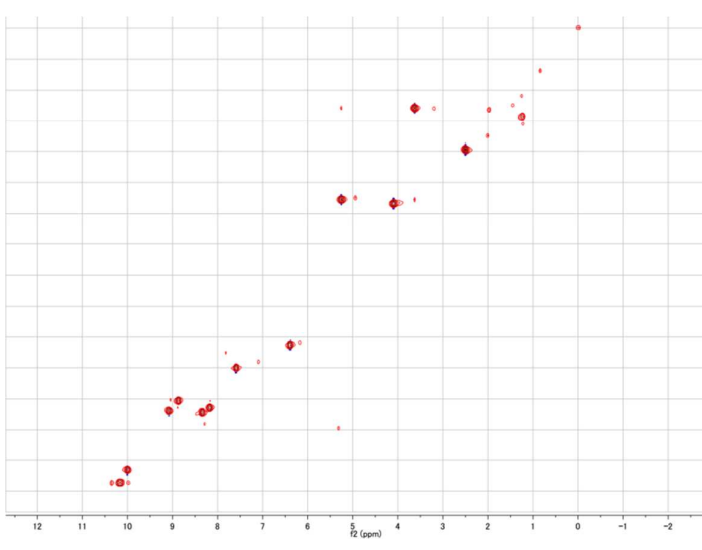

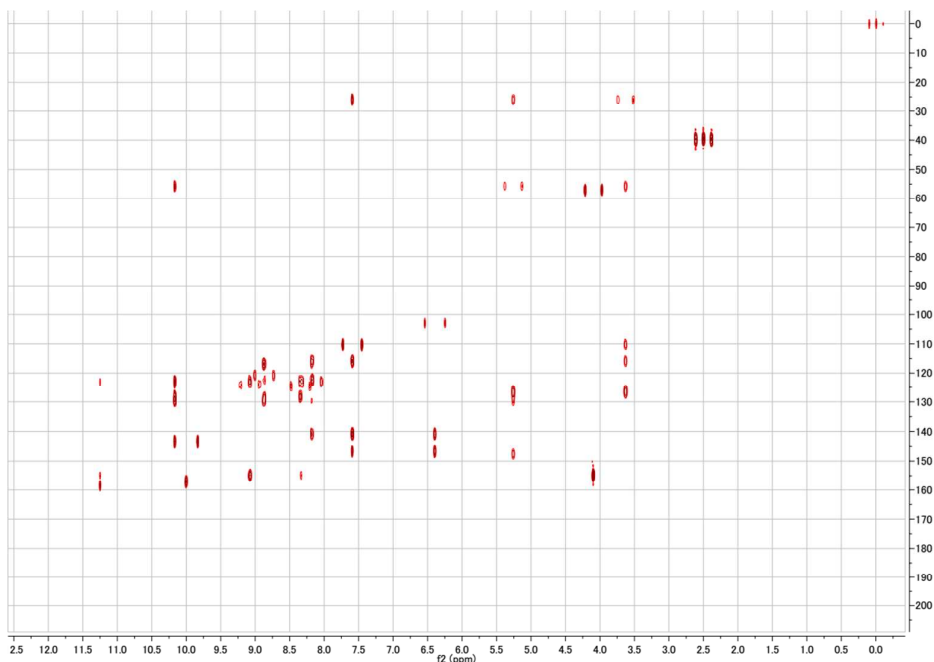

E:\2017\HRMS\0418\F9e

4/18/2017 10:25:58 AM

9e

9e #7-9 RT: 0.10-0.13 AV: 3 NL: 3.53E8

T: FTMS + c ESI Full ms [100.00-1000.00]

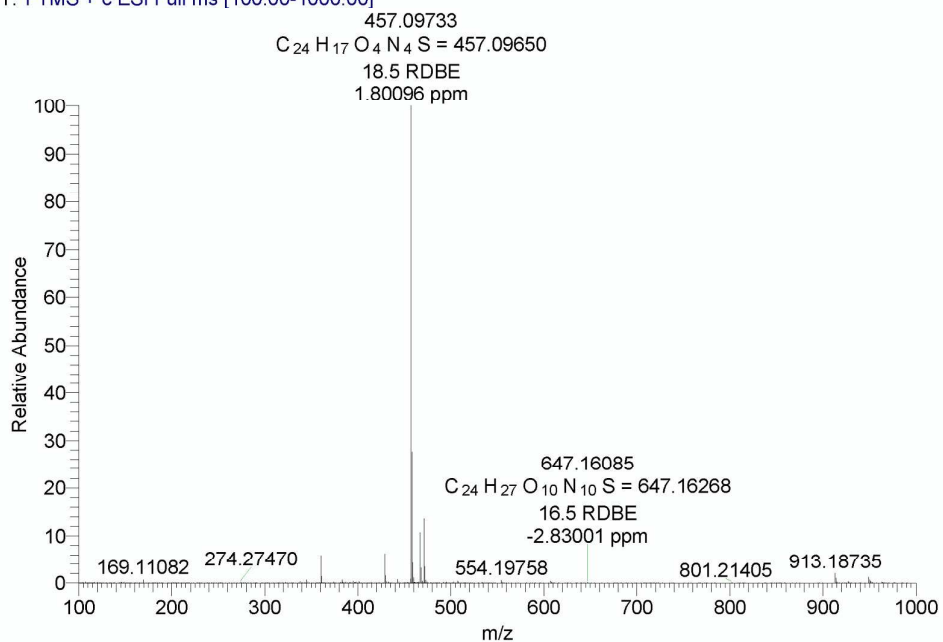

| proton | $^{13}C$ NMR chemical shift values | $^1H$ NMR chemical shift values |
|--------|------------------------------------|---------------------------------|
|--------|------------------------------------|---------------------------------|

|    |       |         |
|----|-------|---------|
| 1  | 122.3 |         |
| 2  | 140.8 |         |
| 3  | 146.6 |         |
| 4  | 110.2 | 7.60 s  |
| 5  | 25.9  | 3.63 t  |
| 6  | 55.7  | 5.26 t  |
| 7  | 147.4 | 10.17 s |
| 8  | 123.0 |         |
| 9  | 154.8 |         |
| 10 | 124.0 | 9.09 d  |
| 11 | 124.5 | 8.34 d  |
| 12 | 120.7 | 8.88 d  |
| 13 | 122.8 | 8.19 d  |
| 14 | 102.8 | 6.40 s  |
| 15 | 115.8 |         |
| 16 | 126.4 |         |
| 17 | 129.3 |         |
| 18 | 116.9 |         |
| 19 | 128.2 |         |
| 20 | 123.0 |         |
| 21 | 56.9  | 4.11 s  |
| 22 | 158.3 |         |
| 23 | 156.8 |         |
| 24 | 143.3 | 10.00 s |
| NH |       | 11.25 s |

# Compound 9f:

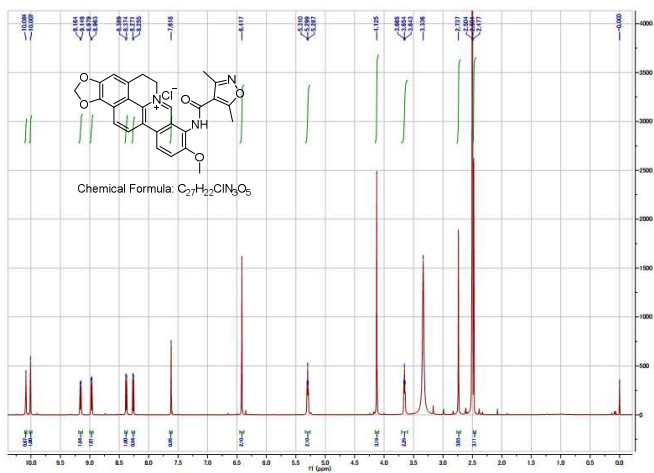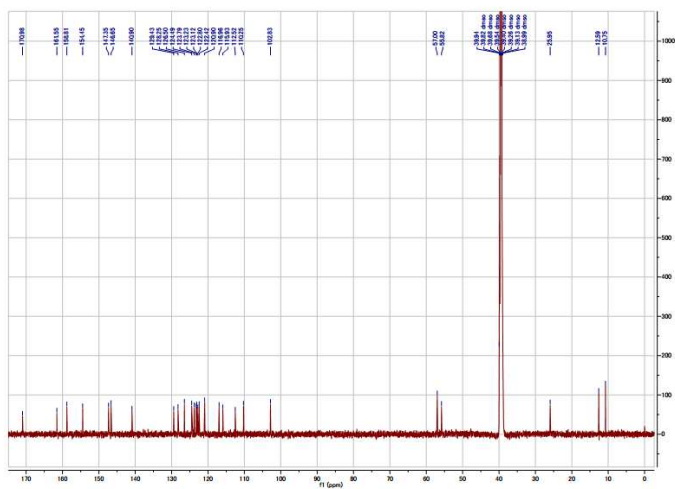

E:\2017\HRMS\0418\F9f

4/18/2017 10:27:03 AM

9f

9f #7-8 RT: 0.10-0.12 AV: 2 NL: 4.64E8

T: FTMS + c ESI Full ms [100.00-1000.00]

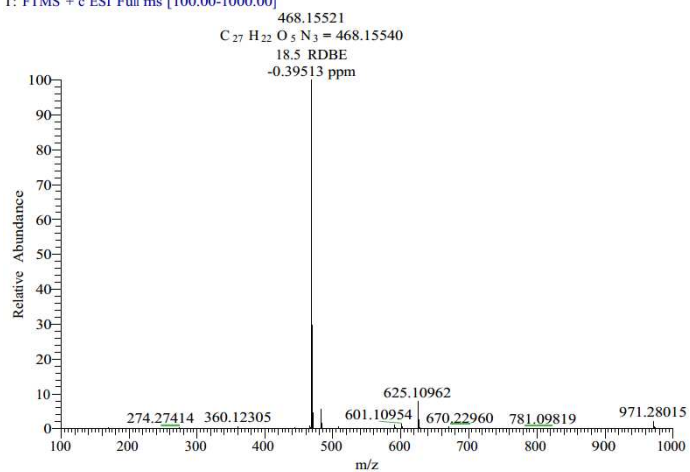

Supplement: ml8b00094_si_001.pdf [file ml8b00094_si_001.pdf]
